# Supplementary material
Source: PubMed Central journal article supplement (PMC5503185)
Supplement: NIHMS877825-supplement-Supporting_Information.pdf [file NIHMS877825-supplement-Supporting_Information.pdf]

# Total Synthesis and in Vitro Anti-tumor-Promoting Activities of Racemic Acetophenone Monomers from *Acronychia trifoliolata*

Chihiro Morita,<sup>†</sup> Yukiko Kobayashi,<sup>†</sup> Yohei Saito,<sup>†</sup> Katsunori Miyake,<sup>†</sup> Harukuni Tokuda,<sup>‡</sup>  
Nobutaka Suzuki<sup>§</sup>, Eiichiro Ichiishi,<sup>⊥</sup> Kuo-Hsiung Lee<sup>||∇</sup> and Kyoko Nakagawa-Goto<sup>†||\*</sup>

<sup>†</sup>*School of Pharmaceutical Sciences, College of Medical, Pharmaceutical and Health Sciences, Kanazawa University, Kanazawa, 920-1192, Japan*

<sup>‡</sup>*Organic Chemistry in Life Science, Division of Food Science and Biotechnology, Graduate School of Agriculture, Kyoto University, Kyoto 606-8502, Japan*

<sup>§</sup>*Department of Complementary and Alternative Medicine, Clinical R&D, Graduate School of Medical Science, Kanazawa University, Kanazawa, 920-1192, Japan*

<sup>⊥</sup>*International Health & Welfare University Hospital, Nasushiobara, Tochigi, 329-2763, Japan*

<sup>||</sup>*Natural Products Research Laboratories, UNC Eshelman School of Pharmacy, University of North Carolina at Chapel Hill, Chapel Hill, NC 27599-7568, United States*

<sup>∇</sup>*Chinese Medicine Research and Development Center, China Medical University and Hospital, 2 Yuh-Der Road, Taichung, 40447, Taiwan*

## Table of Contents

|                                                                                                                                                                   |     |
|-------------------------------------------------------------------------------------------------------------------------------------------------------------------|-----|
| Preparation for <b>9–13</b> and <b>19</b> .....                                                                                                                   | S3  |
| <sup>1</sup> H and <sup>13</sup> C NMR Spectra for <b>Acronyculatin I (1)</b> .....                                                                               | S6  |
| <sup>1</sup> H and <sup>13</sup> C NMR Spectra for <b>Acronyculatin J (2)</b> .....                                                                               | S7  |
| <sup>1</sup> H and <sup>13</sup> C NMR Spectra for <b>Acronyculatin K (3)</b> .....                                                                               | S8  |
| <sup>1</sup> H and <sup>13</sup> C NMR Spectra for <b>Acronyculatin L (4)</b> .....                                                                               | S9  |
| <sup>1</sup> H and <sup>13</sup> C NMR Spectra for <b>Acronyculatin N (5)</b> .....                                                                               | S10 |
| <sup>1</sup> H and <sup>13</sup> C NMR Spectra for <b>Acronyculatin O (6)</b> .....                                                                               | S11 |
| <sup>1</sup> H and <sup>13</sup> C NMR Spectra for <b>Acronyculatin B (7)</b> .....                                                                               | S12 |
| <sup>1</sup> H and <sup>13</sup> C NMR Spectra for compound <b>12</b> .....                                                                                       | S13 |
| <sup>1</sup> H and <sup>13</sup> C NMR Spectra for compound <b>14</b> .....                                                                                       | S14 |
| <sup>1</sup> H and <sup>13</sup> C NMR Spectra for 1-(3,5-dihydroxy-7-methoxy-<br>2,2-dimethylchroman-8-yl)ethan-1-one .....                                      | S15 |
| <sup>1</sup> H and <sup>13</sup> C NMR Spectra for compound <b>15</b> .....                                                                                       | S16 |
| <sup>1</sup> H and <sup>13</sup> C NMR Spectra for compound <b>16</b> .....                                                                                       | S17 |
| <sup>1</sup> H and <sup>13</sup> C NMR Spectra for compound <b>17</b> .....                                                                                       | S18 |
| <sup>1</sup> H and <sup>13</sup> C NMR Spectra for compound <b>18</b> .....                                                                                       | S19 |
| <sup>1</sup> H and <sup>13</sup> C NMR Spectra for 1-[2-hydroxy-4,6-bis(methoxymethoxy)-3-<br>(3-methylbut-2-en-1-yl)phenyl]ethan-1-one .....                     | S20 |
| <sup>1</sup> H and <sup>13</sup> C NMR Spectra for 1-{2,4-bis[(tert-butyldimethylsilyl)oxy]-<br>6-methoxy-3,5-bis(3-methylbut-2-en-1-yl)phenyl} ethan-1-one. .... | S21 |
| <sup>1</sup> H and <sup>13</sup> C NMR Spectra for compound <b>20</b> .....                                                                                       | S22 |
| <sup>1</sup> H and <sup>13</sup> C NMR Spectra for compound <b>21</b> .....                                                                                       | S23 |
| <sup>1</sup> H and <sup>13</sup> C NMR Spectra for 1-{3-hydroxy-5-methoxy-2,2-dimethyl-7-<br>[(3-methylbut-2-en-1-yl)oxy]chroman-6-yl} ethan-1-one. ....          | S24 |
| <sup>1</sup> H and <sup>13</sup> C NMR Spectra for 1-{2,4-bis[(tert-butyldimethylsilyl)oxy]-<br>6-hydroxy-3,5-bis(3-methylbut-2-en-1-yl)phenyl} ethan-1-one. .... | S25 |
| <sup>1</sup> H and <sup>13</sup> C NMR Spectra for 1-{2,4-bis[(tert-butyldimethylsilyl)oxy]-<br>6-methoxy-3,5-bis(3-methylbut-2-en-1-yl)phenyl} ethan-1-one. .... | S26 |
| <sup>1</sup> H and <sup>13</sup> C NMR Spectra for 1-[2-Allyloxy-4,6-bis(methoxymethoxy)phenyl]ethanone. ....                                                     | S27 |
| <sup>1</sup> H and <sup>13</sup> C NMR Spectra for 1-[2-Methoxy-3-(2-propeyl)-4,6-<br>bis(methoxymethoxy)phenyl]ethanone .....                                    | S28 |
| <sup>1</sup> H and <sup>13</sup> C NMR Spectra for compound <b>23</b> .....                                                                                       | S29 |
| <sup>1</sup> H and <sup>13</sup> C NMR Spectra for compound <b>25</b> .....                                                                                       | S30 |
| <sup>1</sup> H and <sup>13</sup> C NMR Spectra for compound <b>26</b> .....                                                                                       | S31 |
| <sup>1</sup> H and <sup>13</sup> C NMR Spectra for compound <b>29</b> .....                                                                                       | S32 |
| <sup>1</sup> H and <sup>13</sup> C NMR Spectra for compound <b>30</b> .....                                                                                       | S33 |
| Assay Curve for Table 3 .....                                                                                                                                     | S34 |

## Preparations of 9–13 and 18

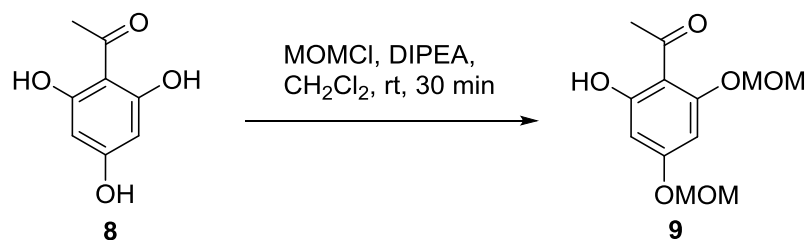

A solution of **8** (500.2 mg, 3.0 mmol) in CH<sub>2</sub>Cl<sub>2</sub> (15 mL) was cooled to 0°C, and DIPEA (1.45 mL, 8.3 mmol) was slowly added. After 20 min, MOMCl (0.54 mL, 7.1 mmol) was added dropwise. The mixture was maintained at 0°C for 20 min, then brought room temperature. The reaction was quenched with water (20.0 mL), and then extracted with CH<sub>2</sub>Cl<sub>2</sub>. The combined organic layers were washed with brine, dried over Na<sub>2</sub>SO<sub>4</sub>, and concentrated *in vacuo*. The residue was purified with column chromatography on silica gel to obtain **9** (422.9 mg, 1.65 mmol, 73% brsm). <sup>1</sup>H-NMR (600 MHz, CDCl<sub>3</sub>, δ): 13.73 (s, 1H, 2-OH), 6.27 (d, *J* = 2.4 Hz, 1H, 3-H), 6.25 (d, *J* = 2.4 Hz, 1H, 5-H), 5.26 (s, 2H, OCH<sub>2</sub>OCH<sub>3</sub>), 5.17 (s, 2H, OCH<sub>2</sub>OCH<sub>3</sub>), 3.52 (s, 3H, 6-OCH<sub>2</sub>OCH<sub>3</sub>), 3.47 (s, 3H, 4-OCH<sub>2</sub>OCH<sub>3</sub>), 2.66 (s, 3H, 1-COCH<sub>3</sub>). The spectra of this product matched those of the known compound.<sup>1</sup>

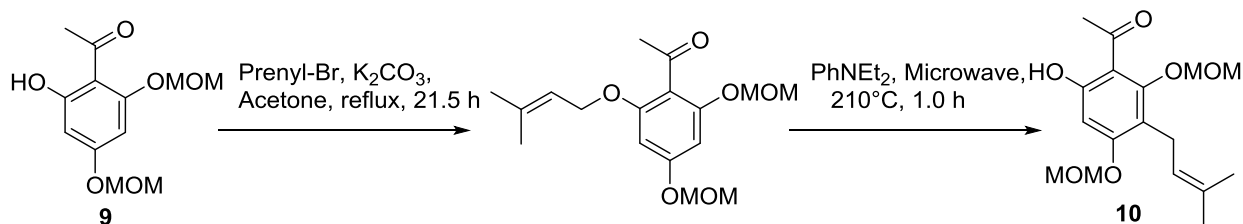

**1-[2,4-Bis(methoxymethoxy)-6-(3-methylbut-2-enyloxy)phenyl]ethanone.** To a solution of **9** (234.2 mg, 0.91 mmol) and K<sub>2</sub>CO<sub>3</sub> (503.2 mg, 3.64 mmol) in acetone (10 mL) was added prenylbromide (0.16 mL, 1.36 mmol) and refluxed for 21.5 h under N<sub>2</sub>. The mixture was cooled to room temperature, filtered with EtOAc, and concentrated *in vacuo*. The residue was chromatographed on silica gel with EtOAc–hexane (1:2) to afford *O*-prenyl compound (272.4 mg, 92%) as colorless solid. <sup>1</sup>H NMR (400 MHz, CDCl<sub>3</sub>) δ 6.44 (d, 1H, *J* = 1.6 Hz), 6.31 (d, 1H, *J* = 2.0 Hz), 5.42–5.38 (m, 1H), 5.15 (s, 2H), 5.13 (s, 2H), 4.49 (d, 2H, *J* = 6.4 Hz), 3.48 (s, 3H), 3.46 (s, 3H), 2.47 (s, 3H), 1.76 (s, 3H), 1.71 (s, 3H). The spectra of this product matched those of the known compound.<sup>1</sup>

**1-(6-Hydroxy-2,4-bis(methoxymethoxy)-3-(3-methylbut-2-enyl)phenyl)ethanone (10).** A solution of 1-[2,4-bis(methoxymethoxy)-6-(3-methylbut-2-enyloxy)phenyl]ethanone (84.9 mg, 0.26 mmol) in *N,N*-diethylaniline (0.5 mL) in a vessel suited for microwave irradiation and irradiated at 210 °C for 1.0 h. The mixture was washed with aqueous 10% HCl, water, brine, dried over Na<sub>2</sub>SO<sub>4</sub>, and concentrated *in vacuo*. The residue was chromatographed on silica gel with EtOAc–hexane (1:20) to afford the target **10** (67.2 mg, 79%) as yellow oil. <sup>1</sup>H NMR (400 MHz, CDCl<sub>3</sub>) δ 12.9 (1H, s), 6.47 (1H, s), 5.22 (2H, s), 5.16–5.14 (1H, m), 4.96 (2H, s), 3.52 (3H, s), 3.46 (3H, s), 3.31 (2H, d, *J* = 7.2 Hz), 2.70 (3H, s), 1.76 (3H, s), 1.71 (3H, s). The spectra of this product matched those of the known compound.<sup>1</sup>

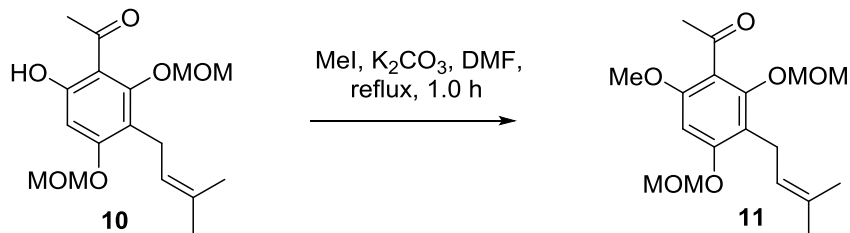

**1-(6-Methoxy-2,4-bis(methoxymethoxy)-3-(3-methylbut-2-enyl)phenyl)ethanone (11).** To a solution of **10** (96.4 mg, 0.30 mmol) in anhydrous DMF (6.0 mL) were added  $K_2CO_3$  (205 mg, 1.48 mmol) and Iodomethane (0.05 mL, 0.75 mmol). The mixture was refluxed for 1.0 h under  $N_2$ . The mixture was cooled to room temperature, quenched with water (10 mL) and extracted three times with EtOAc. The combined organic layers were washed with brine, dried over  $Na_2SO_4$  and concentrated *in vacuo*. The residue was chromatographed on silica gel with EtOAc–hexane (1:5) to afford the target compound **11** (96.5 mg, 96%) as yellow oil.  $^1H$  NMR (400 MHz,  $CDCl_3$ )  $\delta$  6.54 (1H, s), 5.20 (2H, s), 5.15–5.12 (1H, m), 4.90 (2H, s), 3.80 (3H, s), 3.49 (3H, s), 3.47 (3H, s), 3.30 (2H, d,  $J = 6.4$  Hz), 2.50 (3H, s), 1.74 (3H, s), 1.65 (3H, s). The spectra of this product matched those of the known compound.<sup>1</sup>

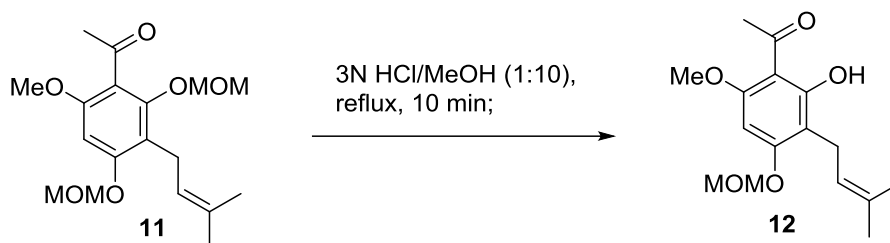

**1-(2-Hydroxy-6-methoxy-4-(methoxymethoxy)-3-(3-methylbut-2-enyl)phenyl)ethanone (12).** To a solution of **11** (88.8 mg, 0.26 mmol) in anhydrous MeOH (6.0 mL) was added 3N HCl (0.6 mL) and refluxed for 10 min under  $N_2$ . The mixture was cooled to room temperature, quenched with water and extracted three times with EtOAc. The combined organic layers were washed with brine, dried over  $Na_2SO_4$  and concentrated *in vacuo*. The residue was chromatographed on silica gel with EtOAc–hexane (1:6) to afford the target **12** (71.2 mg, 92%) as pale yellow solid:  $^1H$  NMR (600 MHz,  $CDCl_3$ )  $\delta$  14.0 (1H, s), 6.19 (1H, s), 5.25 (2H, s), 5.20–5.18 (1H, m), 3.86 (3H, s), 3.48 (3H, s), 3.29 (2H, d,  $J = 6.6$  Hz), 2.61 (3H, s), 1.78 (3H, s), 1.66 (3H, s);  $^{13}C$  NMR (150 MHz,  $CDCl_3$ )  $\delta$  203.6, 163.7, 161.4, 160.9, 131.3, 122.7, 110.6, 106.6, 93.9, 88.5, 56.2, 55.4, 33.2, 25.8, 21.5, 17.8; HRMS (FAB)  $m/z$  295.1541 [ $M + H$ ]<sup>+</sup> (calcd for  $C_{16}H_{23}O_5$ , 295.1545). The spectra of this product matched those of the known compound.<sup>2</sup>

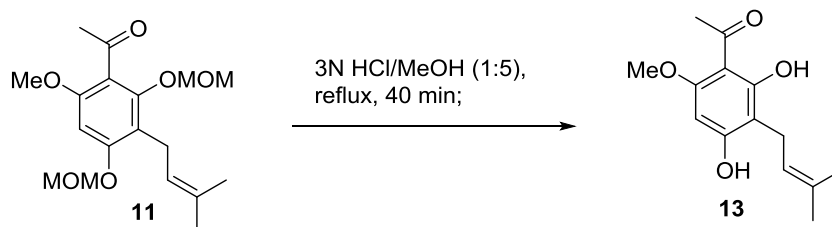

**1-[2,4-Dihydroxy-6-methoxy-3-(3-methylbut-2-enyl)phenyl]ethanone (13).** To a solution of **11** (95.4 mg, 0.28 mmol) in anhydrous MeOH 5.5 mL was added 3N HCl (1.1 mL) and refluxed for 40 min under N<sub>2</sub>. The mixture was cooled to room temperature, quenched with water and extracted three times with EtOAc. The combined organic layers were washed with brine, dried over Na<sub>2</sub>SO<sub>4</sub> and concentrated *in vacuo*. The residue was chromatographed on silica gel with EtOAc–hexane (1:6) to afford the target **13** (51.8 mg, 73%) as colorless solid: <sup>1</sup>H NMR (400 MHz, CDCl<sub>3</sub>) δ 14.4 (1H, s), 6.14 (1H, s), 5.90 (1H, s), 5.30–5.26 (1H, m), 3.84 (3H, s), 3.37 (2H, d, *J* = 7.6 Hz), 2.61 (3H, s), 1.82 (3H, s), 1.77 (3H, s). The spectra of this product matched those of the known compound.<sup>2</sup>

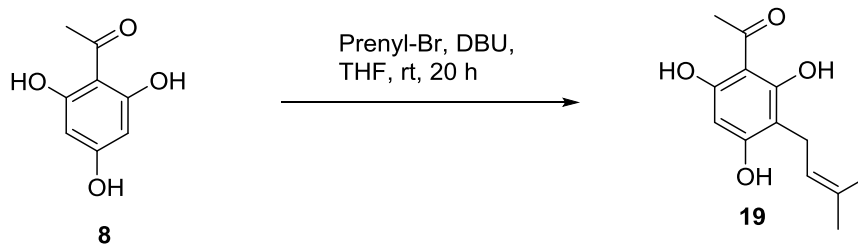

**2,4,6-Trihydroxy-3-prenylacetophenone (19).** To a solution of **8** (106.4 mg, 0.63 mmol) in anhydrous THF (4.0 mL) were added DBU (0.08 mL, 0.54 mmol) and prenylbromide (0.07 mL, 0.60 mmol). The whole was stirred at room temperature for 18 h under N<sub>2</sub>. After addition of saturated NH<sub>4</sub>Cl water (15.0 mL), the mixture was extracted three times with EtOAc. The combined organic layers were washed with brine, dried over Na<sub>2</sub>SO<sub>4</sub> and concentrated *in vacuo*. The residue was chromatographed on silica gel with EtOAc–hexane (1:4) to afford **19** (84.6 mg, 57%) as pale yellow oil. <sup>1</sup>H NMR (600 MHz, DMSO) δ 14.0 (1H, s), 10.5 (1H, s), 10.3 (1H, s), 5.95 (1H, s), 5.07–5.05 (1H, m), 3.03 (2H, d, *J* = 6.6 Hz), 2.50 (3H, s), 1.63 (3H, s), 1.55 (3H, s). The spectra of this product matched those of the known compound.<sup>3</sup>

### Spectrum Data of 31

**1-[4-(*tert*-Butyldimethylsilyloxy)-2-(2-hydroxypropan-2-yl)-6-methoxy-5-(3-methylbut-2-enyl)-2,3-dihydrobenzofuran-7-yl]ethanone (31).** <sup>1</sup>H NMR (400 MHz, CDCl<sub>3</sub>) δ 5.12–5.09 (1H, m), 4.62 (1H, t, *J* = 8.8 Hz), 3.68 (3H, s), 3.23 (2H, d, *J* = 6.0 Hz), 3.11–3.00 (2H, m), 2.57 (3H, s), 1.71 (3H, s), 1.67 (3H, s), 1.35 (3H, s), 1.22 (3H, s), 1.01 (9H, s), 0.22 (3H, s), 0.21 (3H, s).

### References

- (1) Khupse, R. S.; Erhardt, P. W. *J. Nat. Prod.*, **2007**, *70*, 1507–1509.
- (2) Tan, W. F.; Li, W. D.; Li, Y. L. *Synth. Comm.* **2002**, *32*, 1077–1083.
- (3) Lee, Y. R.; Li, X.; Kim, J. H. *J. Org. Chem.*, **2008**, *73*, 4313–4316.

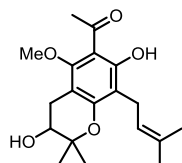

**Acronyculatin I (1)**  
<sup>1</sup>H NMR Spectrum  
 (CDCl<sub>3</sub>, 600 MHz)

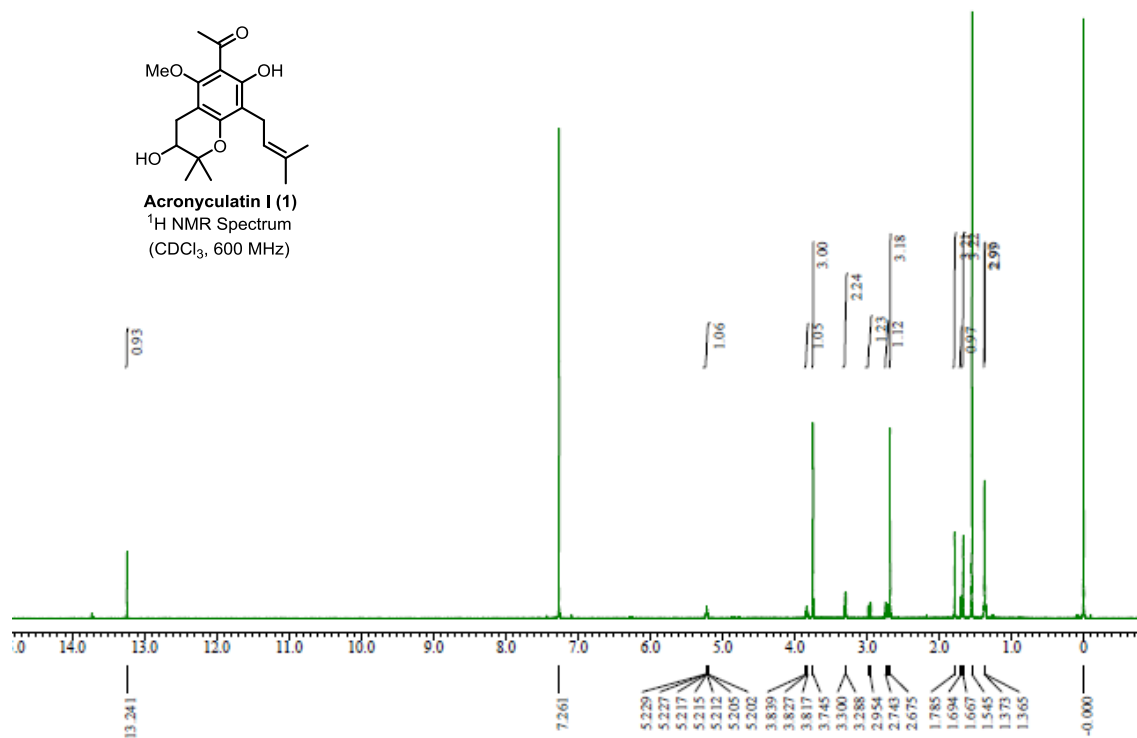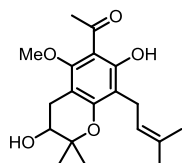

**Acronyculatin I (1)**  
<sup>13</sup>C NMR Spectrum  
 (CDCl<sub>3</sub>, 150 MHz)

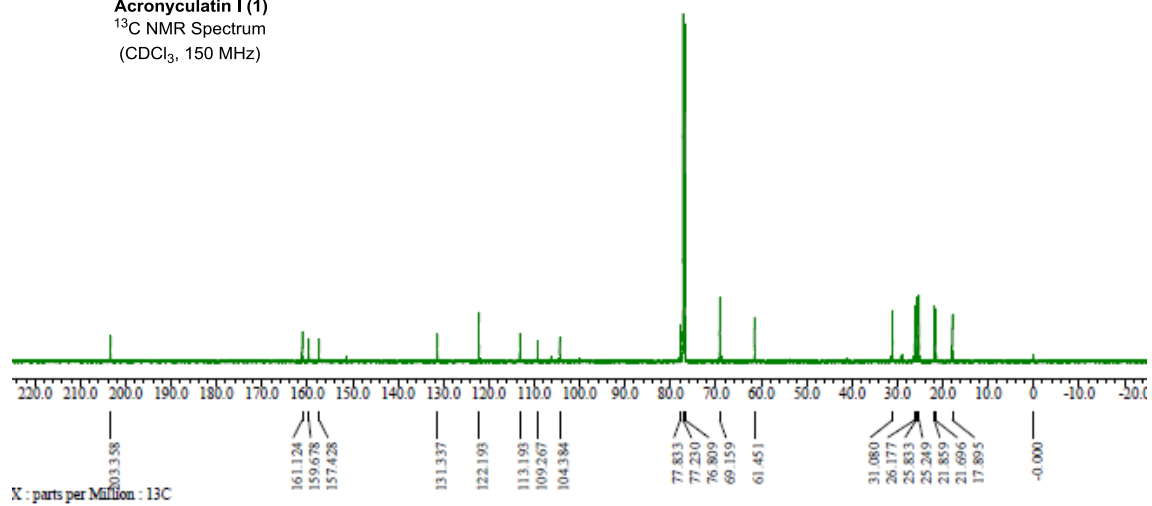

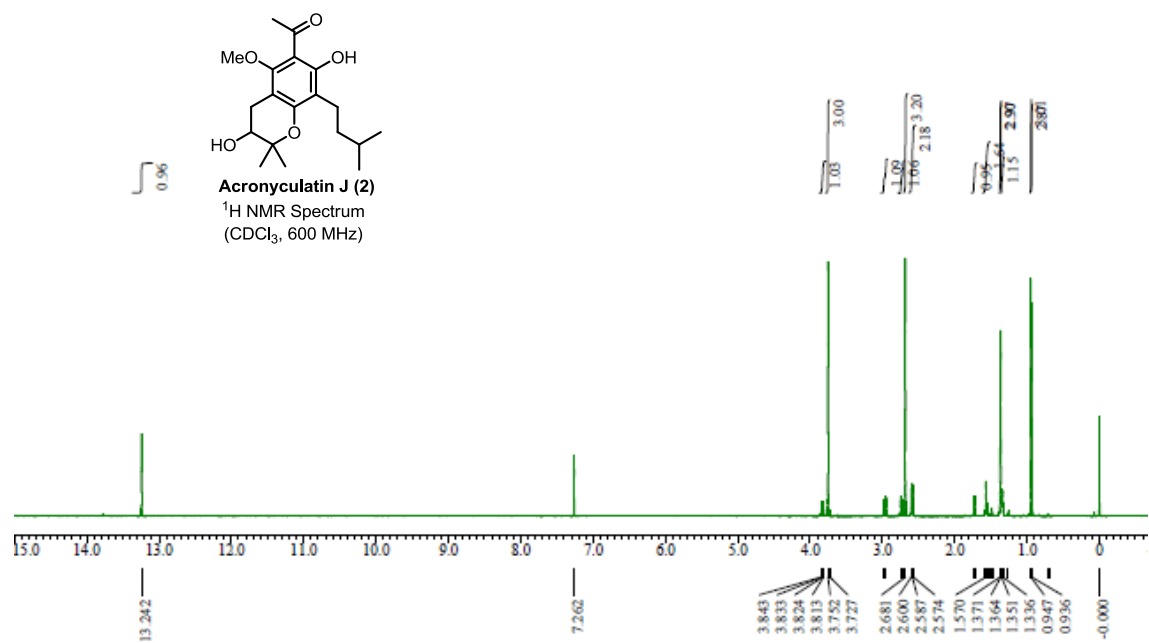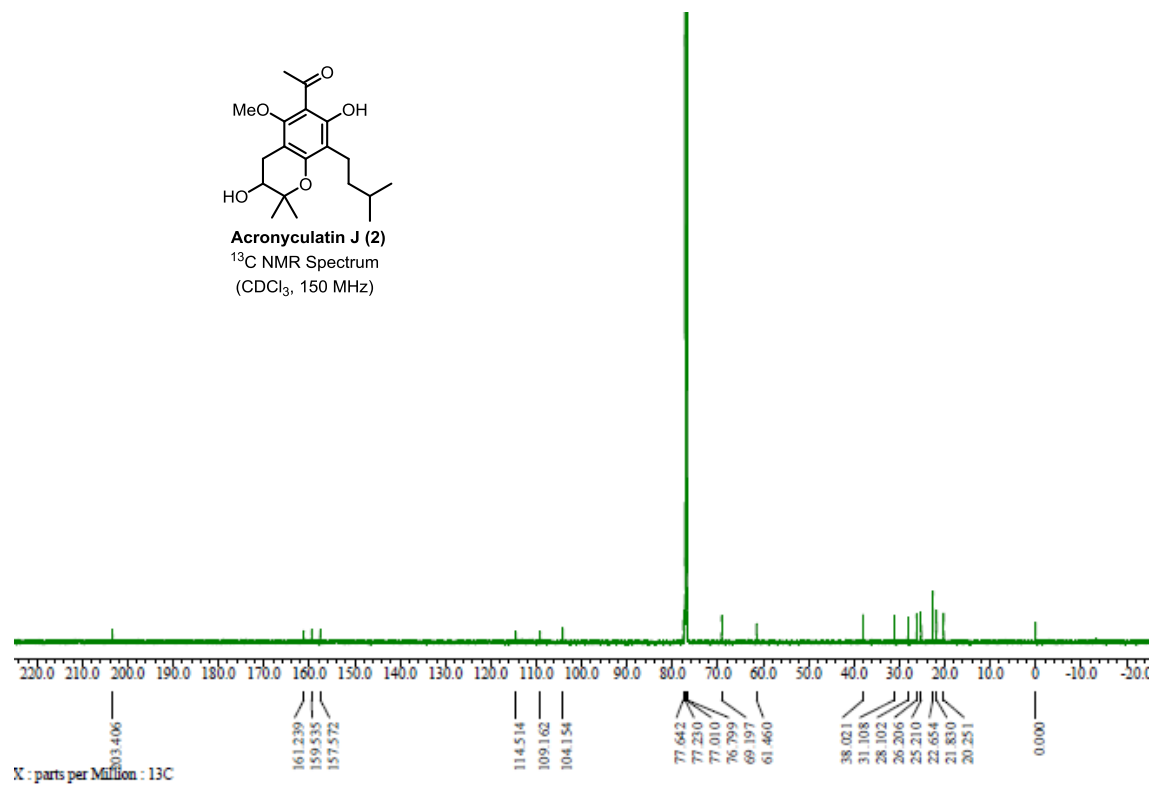

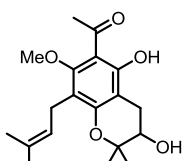

**Acronyculatin K (3)**  
<sup>1</sup>H NMR Spectrum  
 (CDCl<sub>3</sub>, 600 MHz)

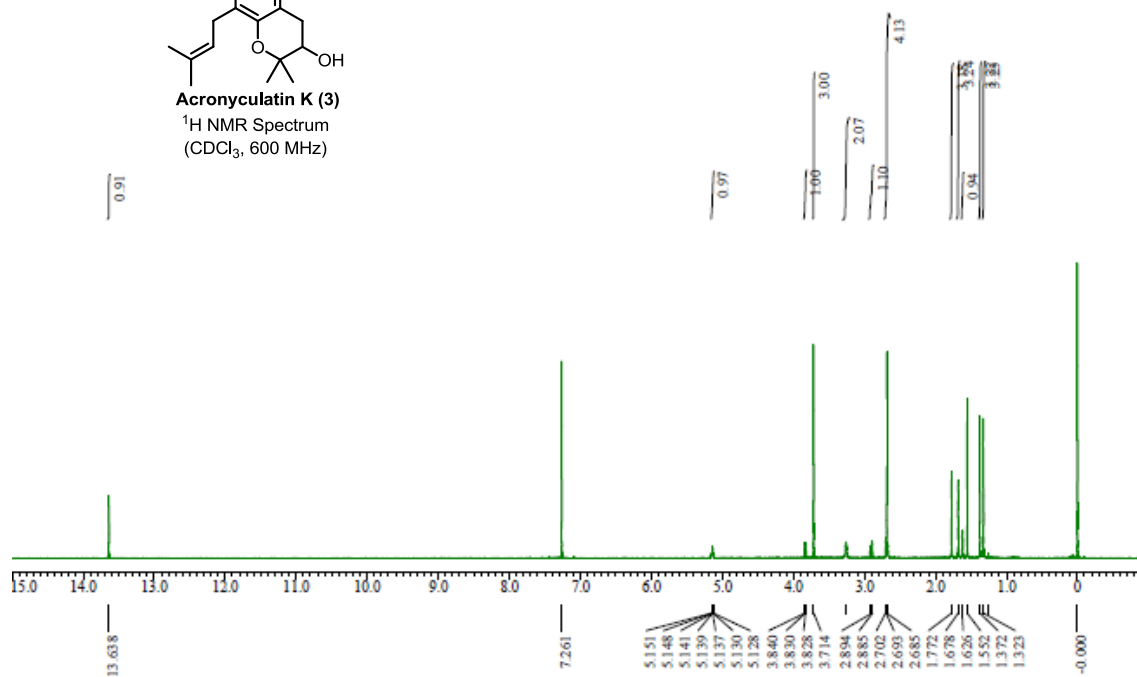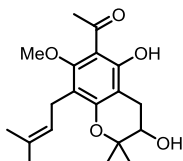

**Acronyculatin K (3)**  
<sup>13</sup>C NMR Spectrum  
 (CDCl<sub>3</sub>, 150 MHz)

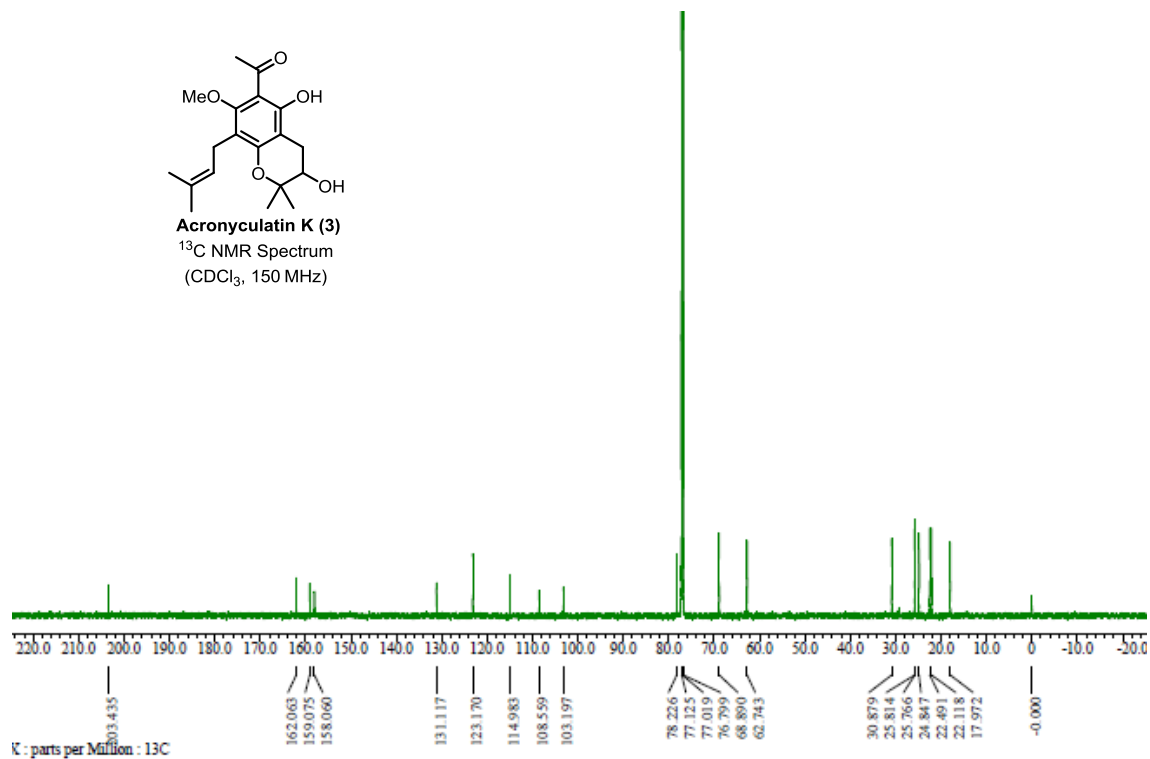



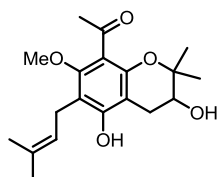

**Acronyculatin L (4)**

<sup>1</sup>H NMR Spectrum

(CDCl<sub>3</sub>, 600 MHz)

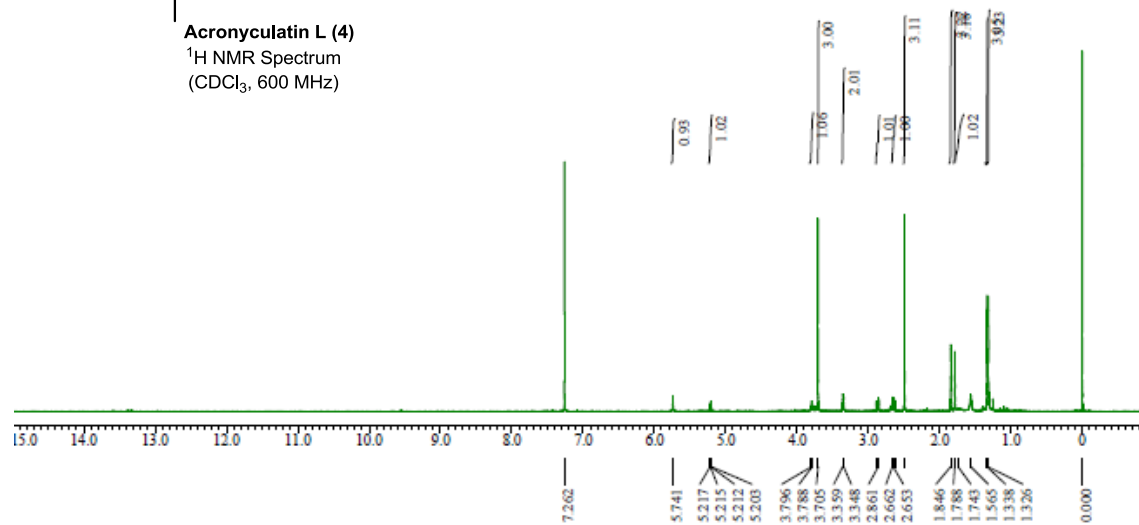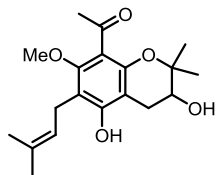

**Acronyculatin L (4)**

<sup>13</sup>C NMR Spectrum

(CDCl<sub>3</sub>, 150 MHz)

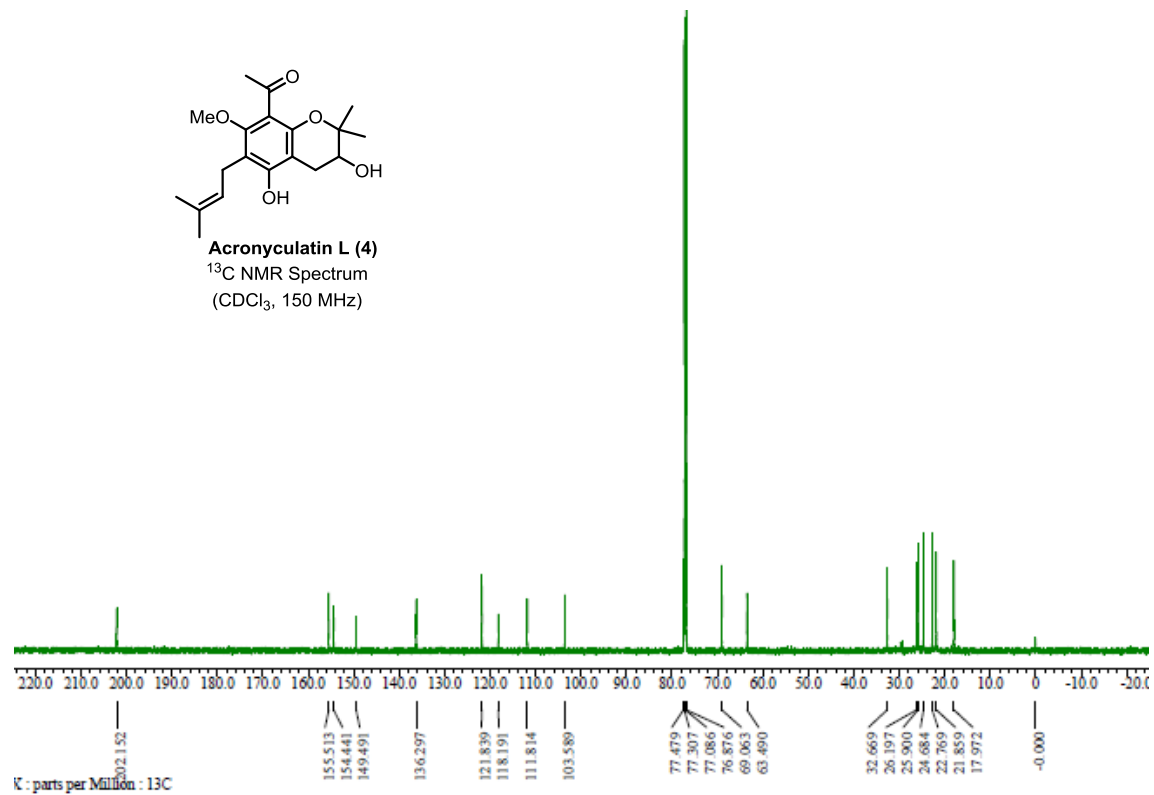

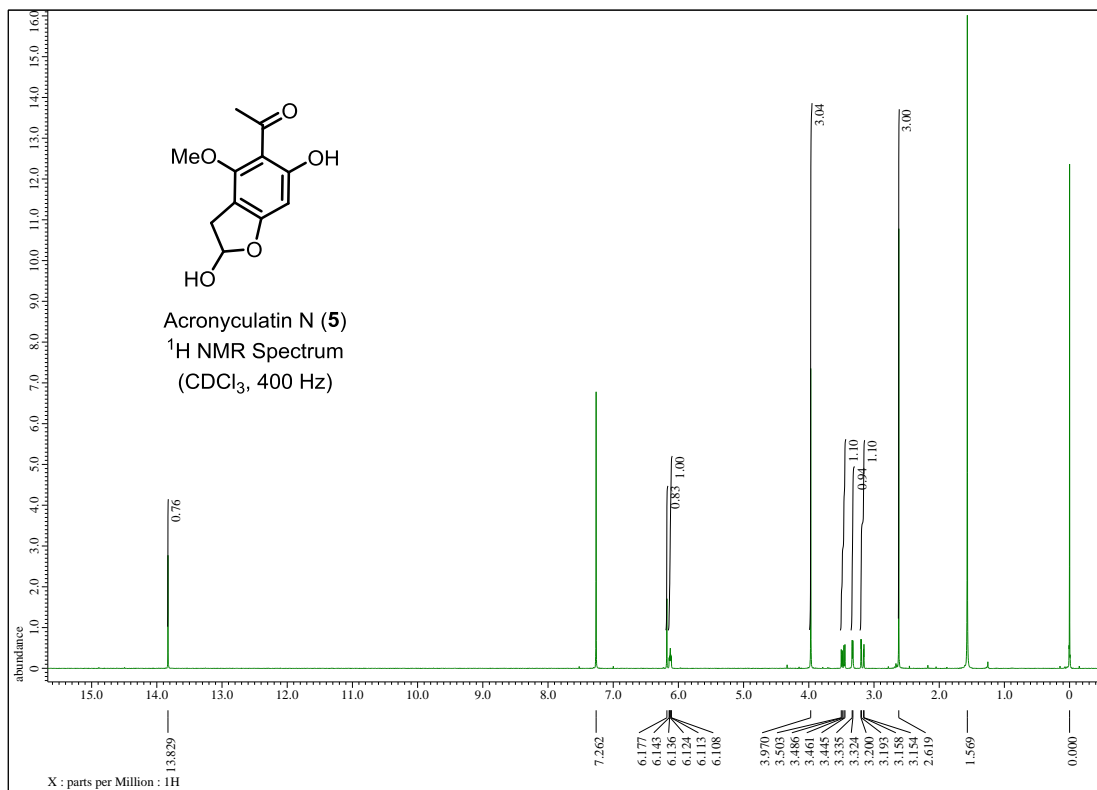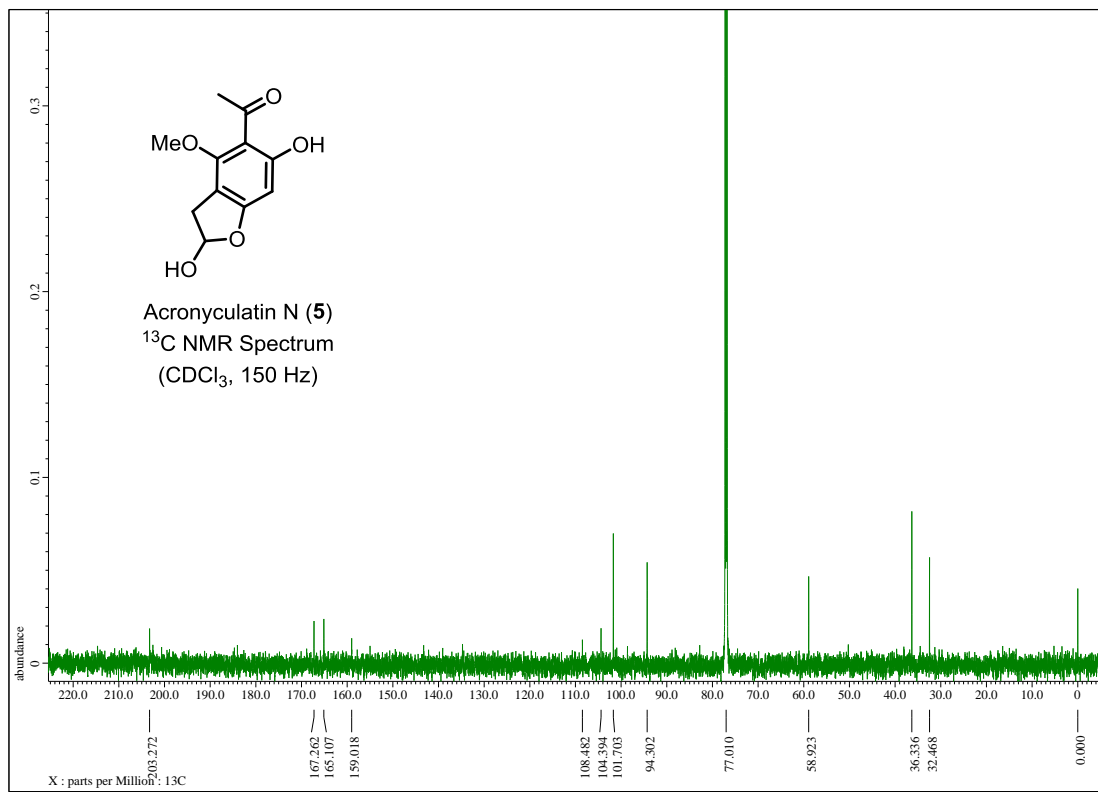

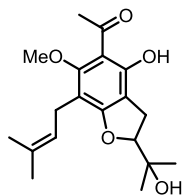

**Acronyculatin O (6)**  
<sup>1</sup>H NMR Spectrum  
 (CDCl<sub>3</sub>, 600 MHz)

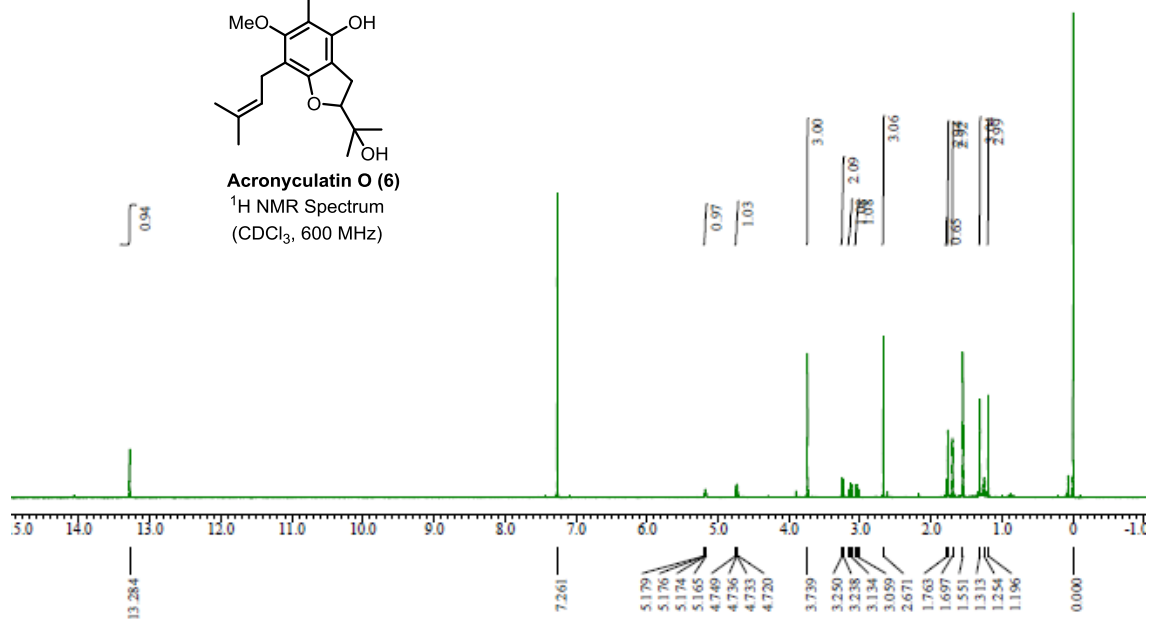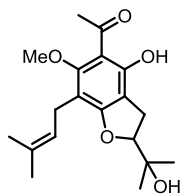

**Acronyculatin O (6)**  
<sup>13</sup>C NMR Spectrum  
 (CDCl<sub>3</sub>, 150 MHz)

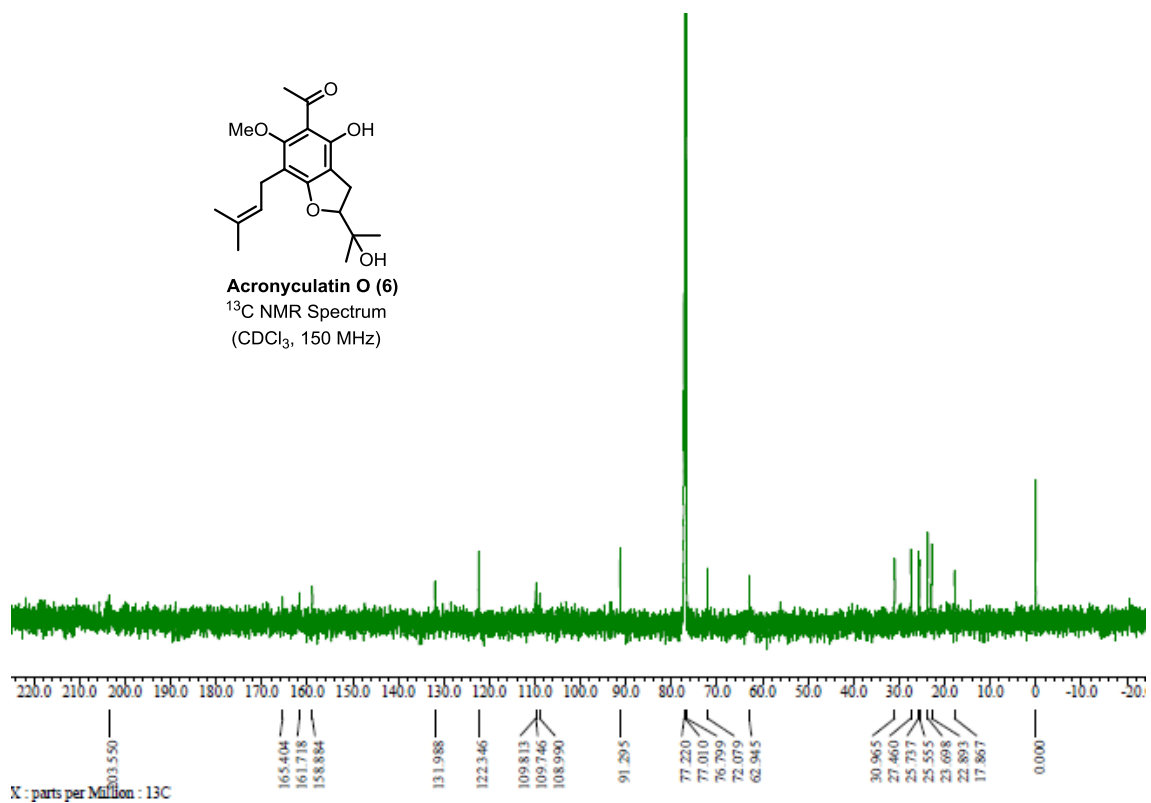

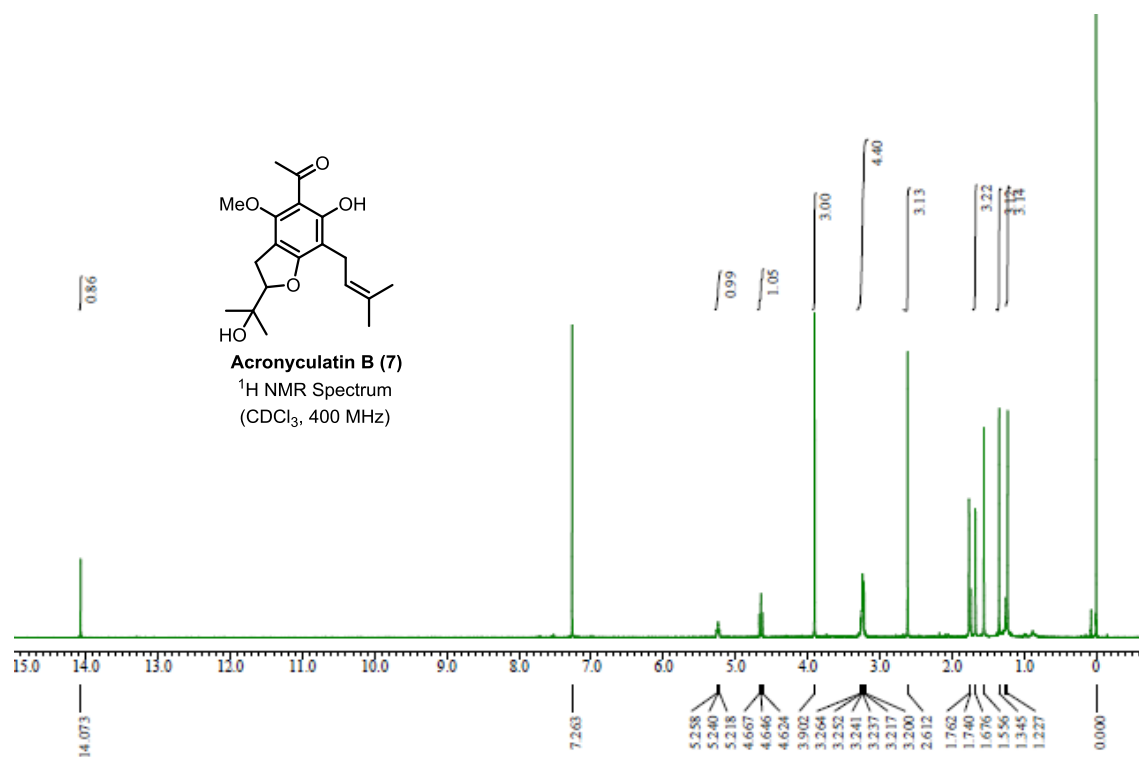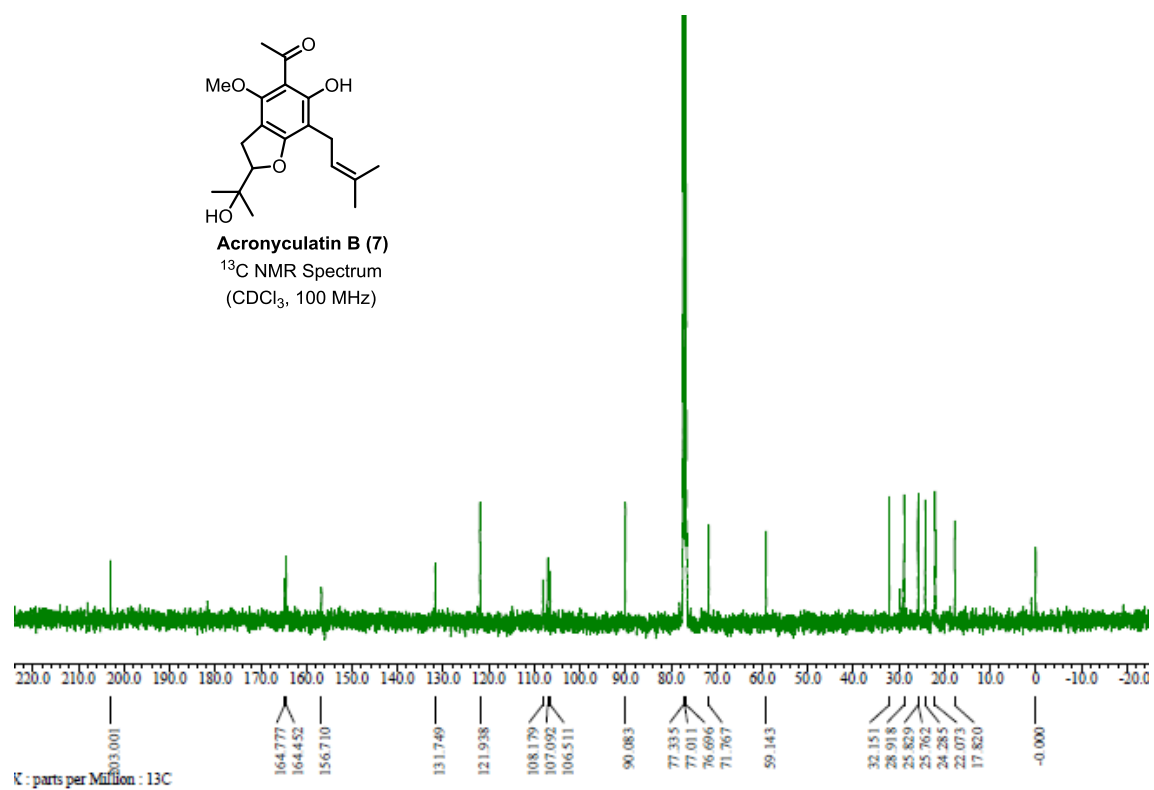

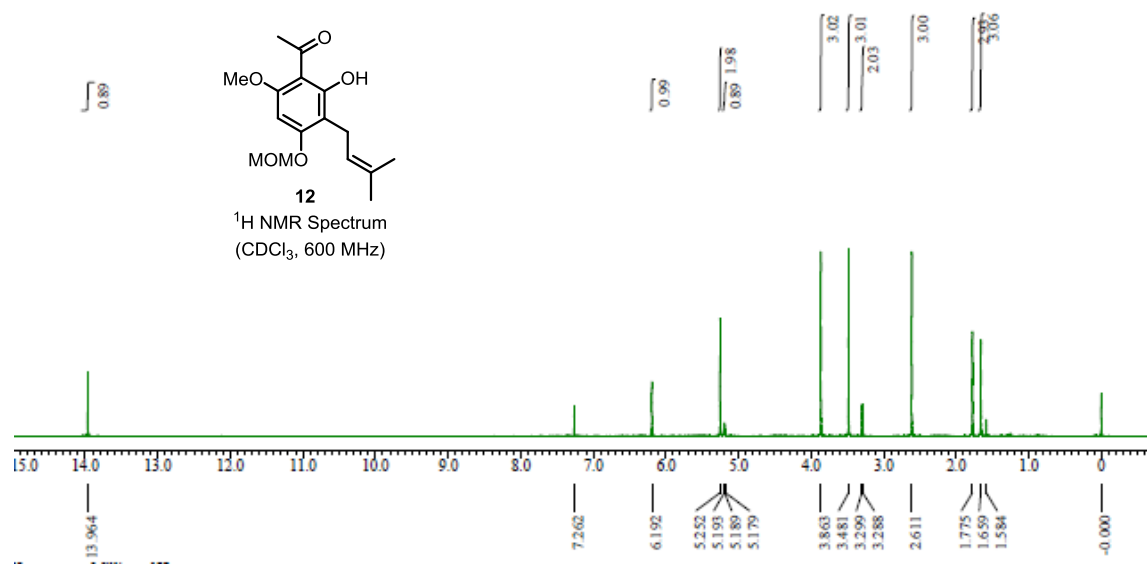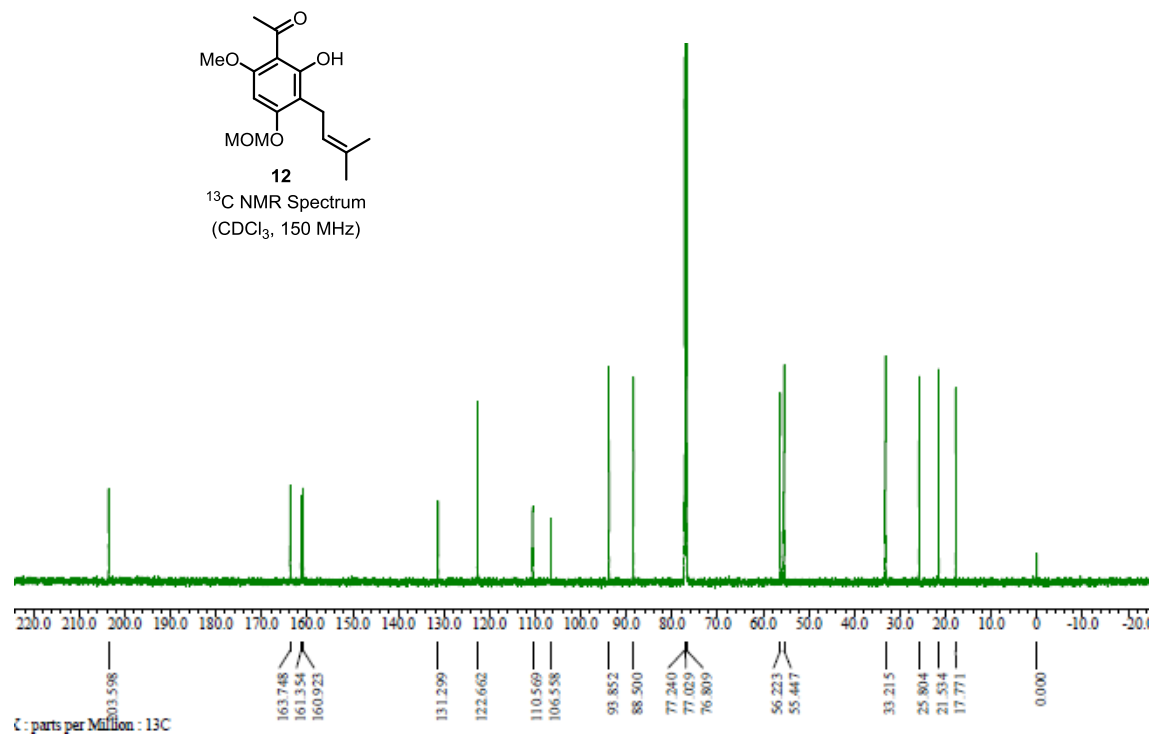

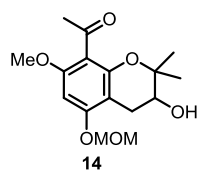

<sup>1</sup>H NMR Spectrum  
(CDCl<sub>3</sub>, 600 MHz)

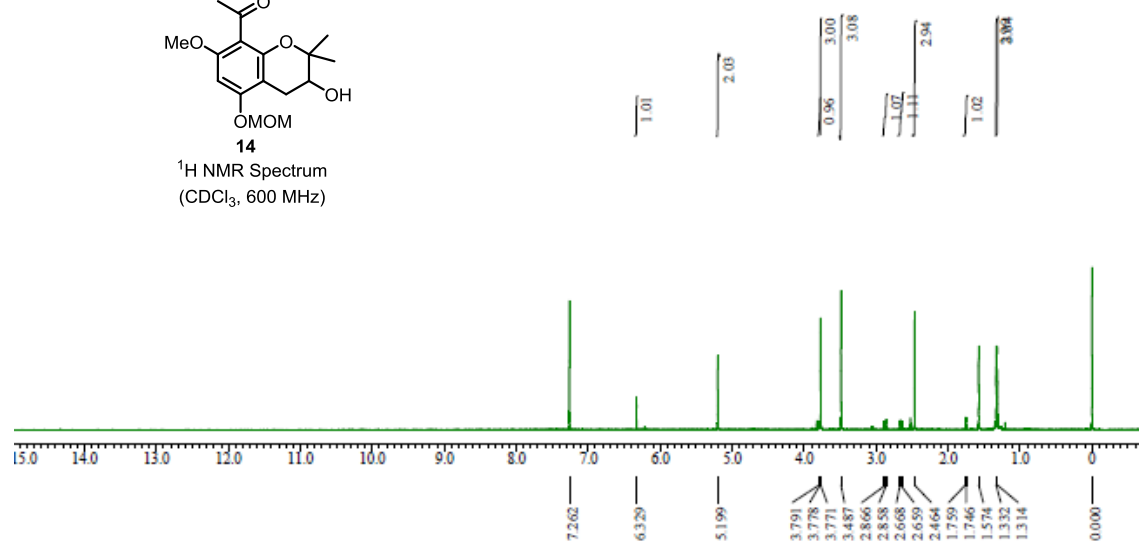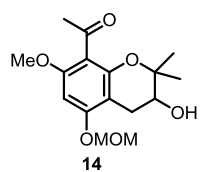

<sup>13</sup>C NMR Spectrum  
(CDCl<sub>3</sub>, 150 MHz)

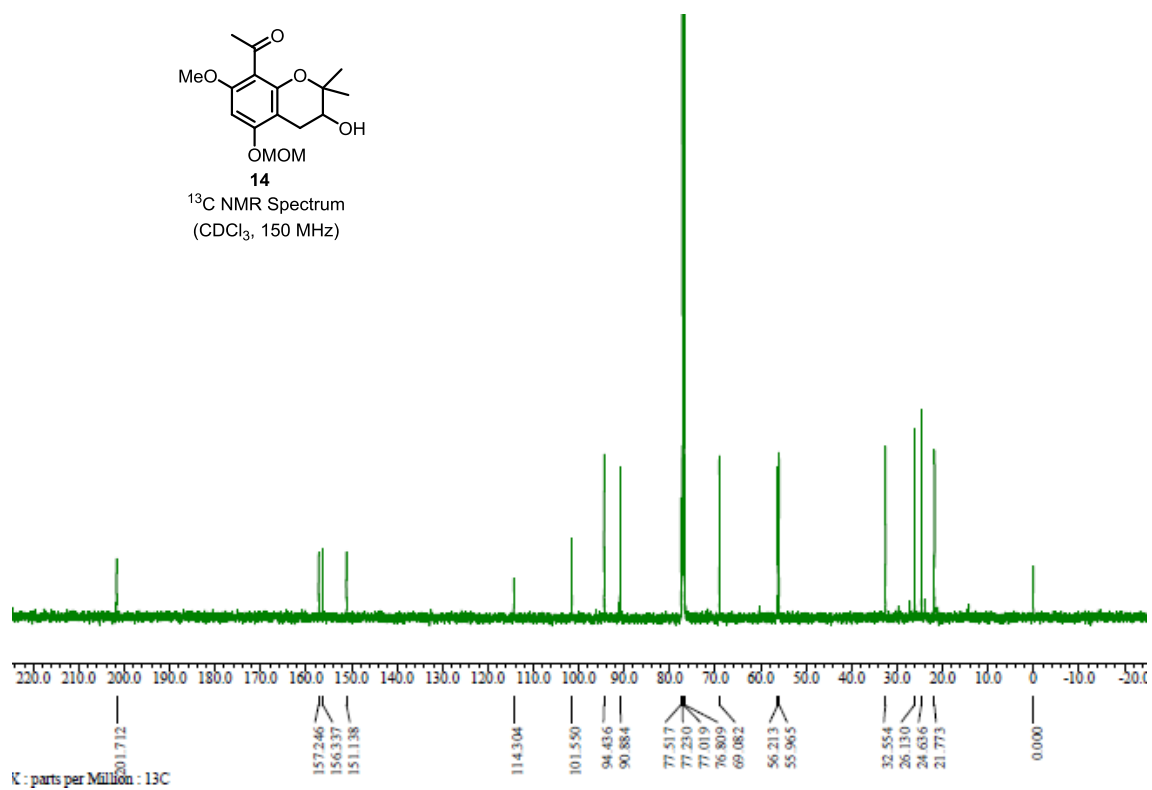

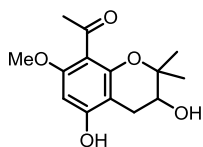

1-(3,5-dihydroxy-7-methoxy-2,2-dimethylchroman-8-yl)ethan-1-one

<sup>1</sup>H NMR Spectrum  
(CDCl<sub>3</sub>, 600 MHz)

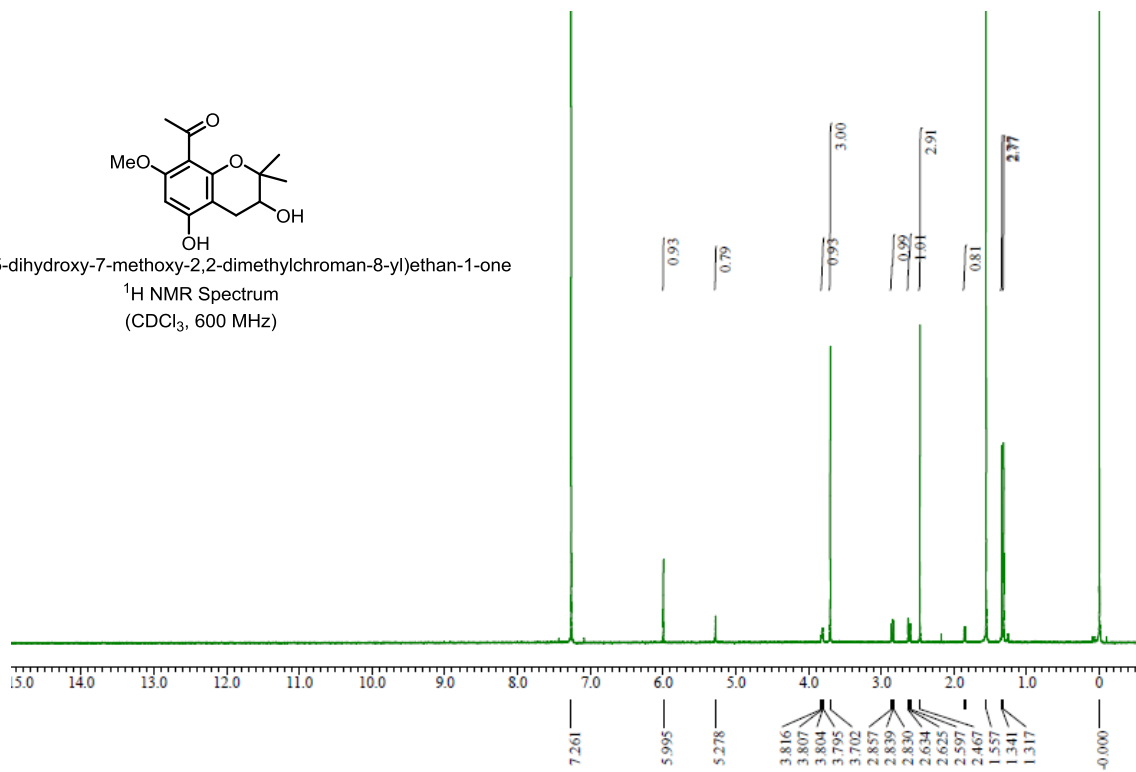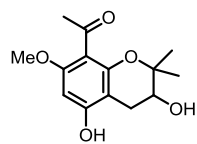

1-(3,5-dihydroxy-7-methoxy-2,2-dimethylchroman-8-yl)ethan-1-one

<sup>13</sup>C NMR Spectrum  
(Acetone-d<sub>6</sub>, 150 MHz)

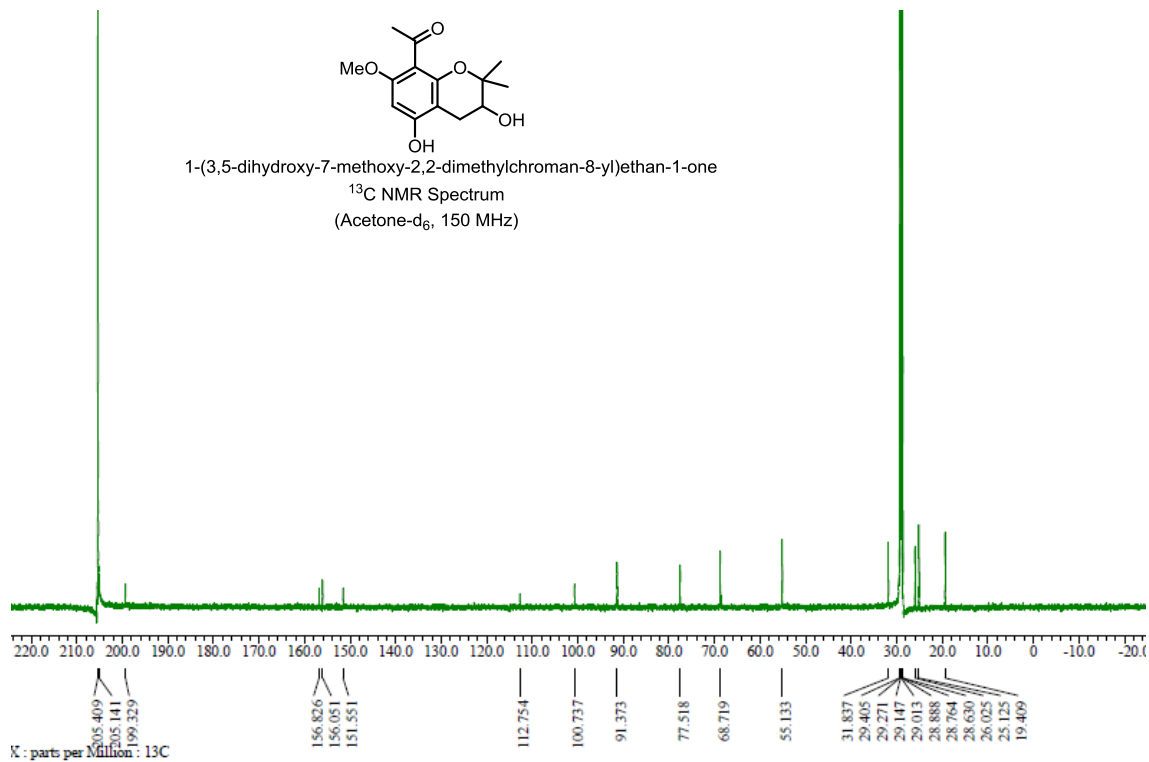

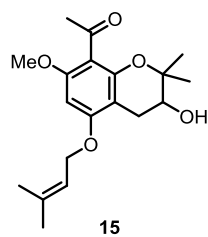

<sup>1</sup>H NMR Spectrum  
(CDCl<sub>3</sub>, 600 MHz)

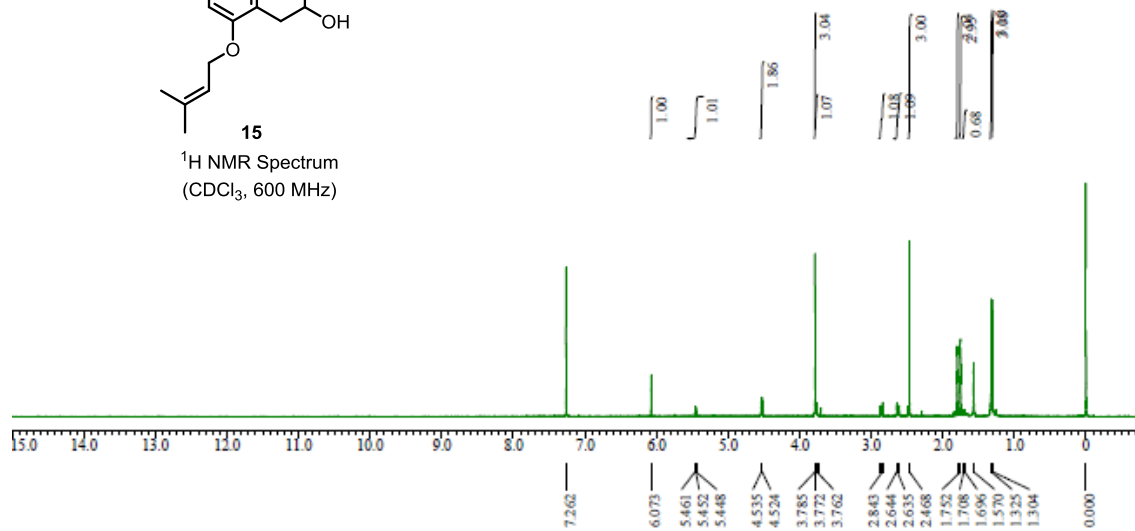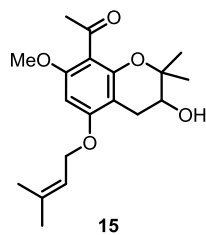

<sup>13</sup>C NMR Spectrum  
(CDCl<sub>3</sub>, 150 MHz)

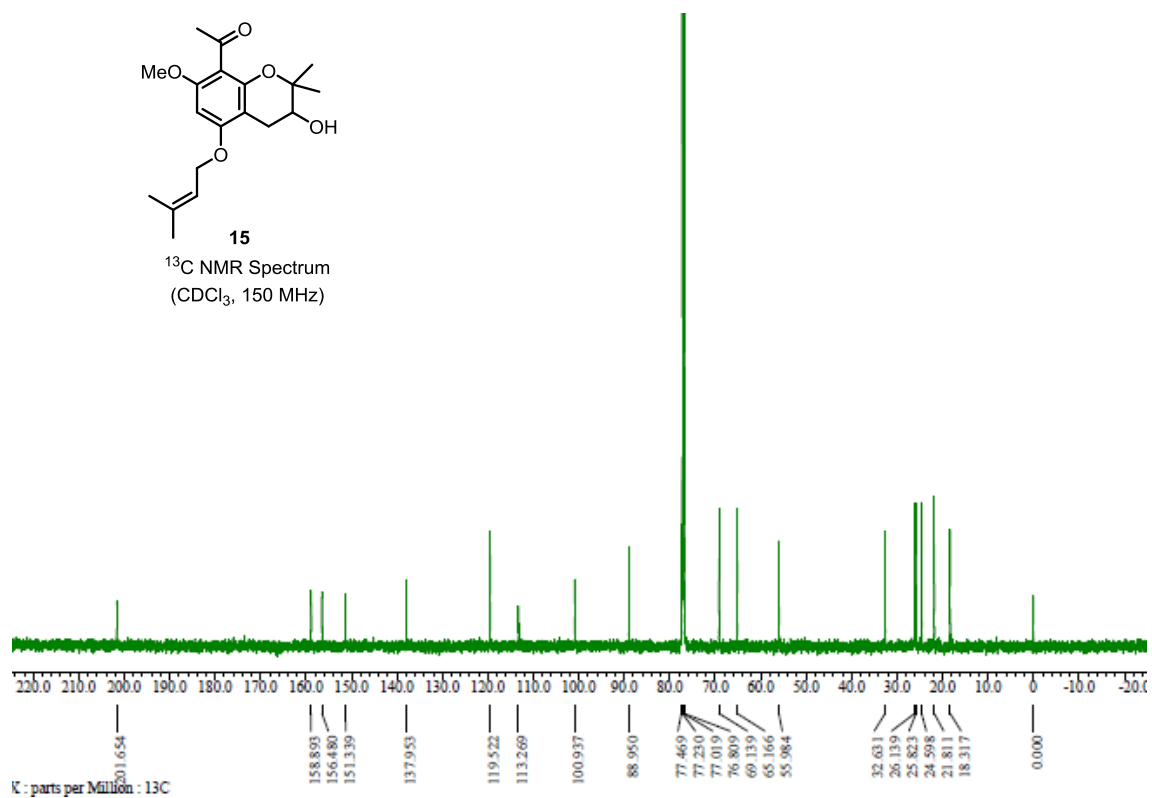



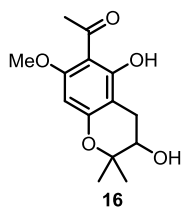

<sup>1</sup>H NMR Spectrum  
(CDCl<sub>3</sub>, 600 MHz)

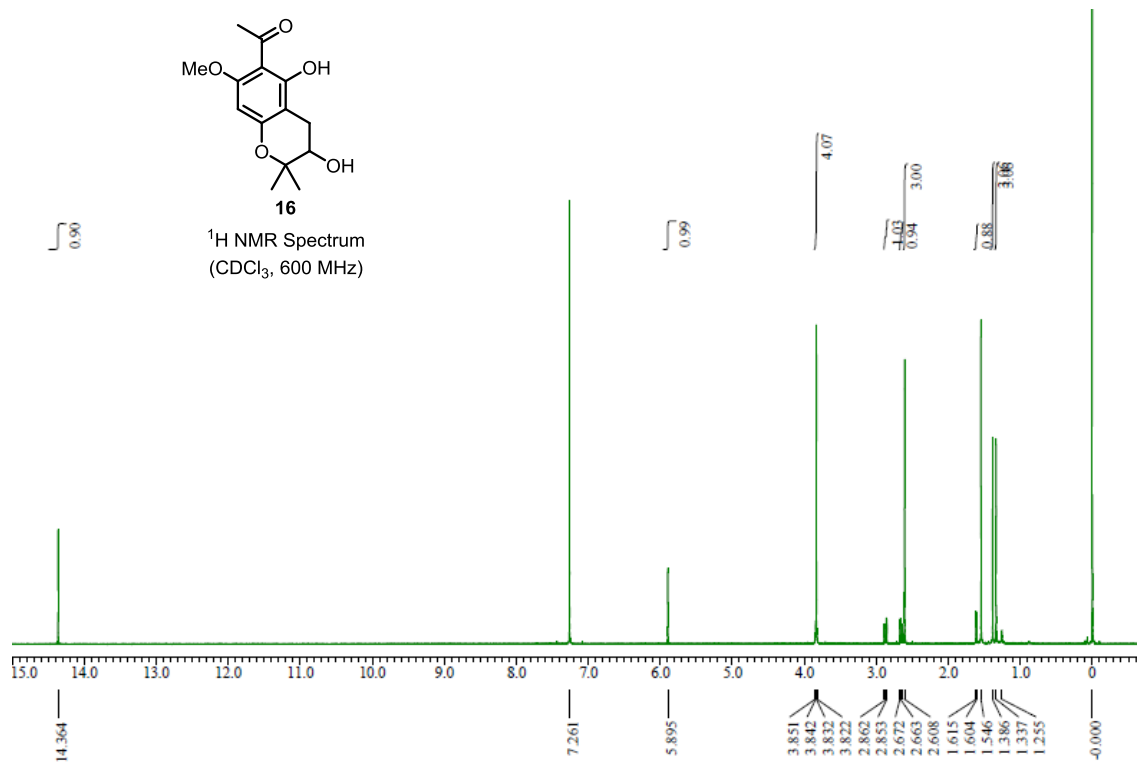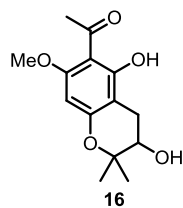

<sup>1</sup>H NMR Spectrum  
(CDCl<sub>3</sub>, 150 MHz)

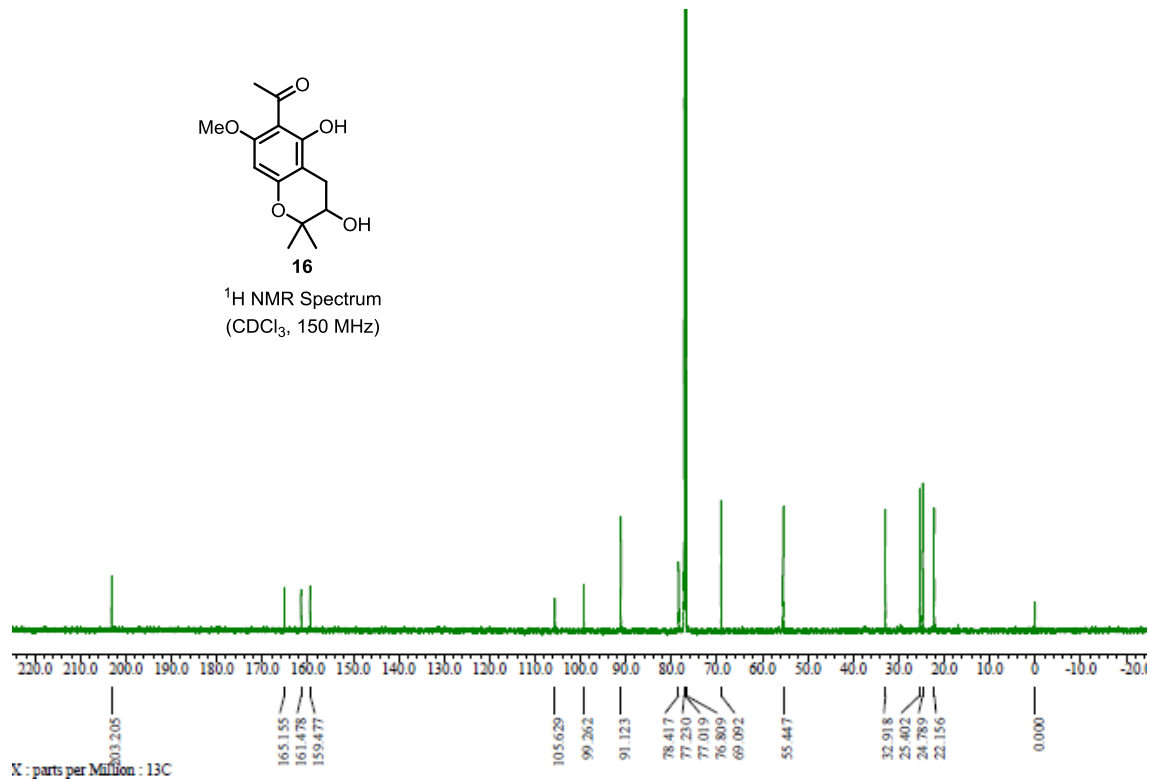

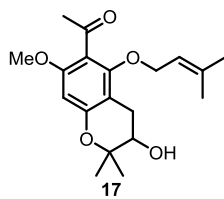

<sup>1</sup>H NMR Spectrum  
(CDCl<sub>3</sub>, 600 MHz)

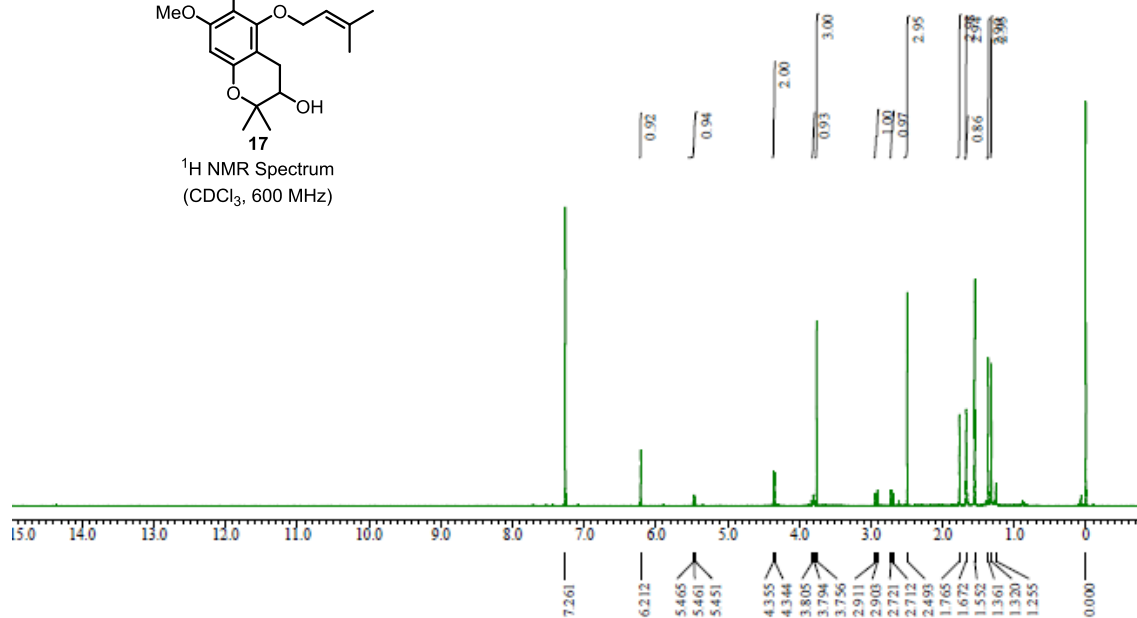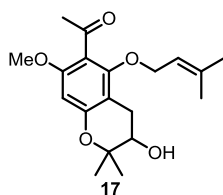

<sup>13</sup>C NMR Spectrum  
(CDCl<sub>3</sub>, 150 MHz)

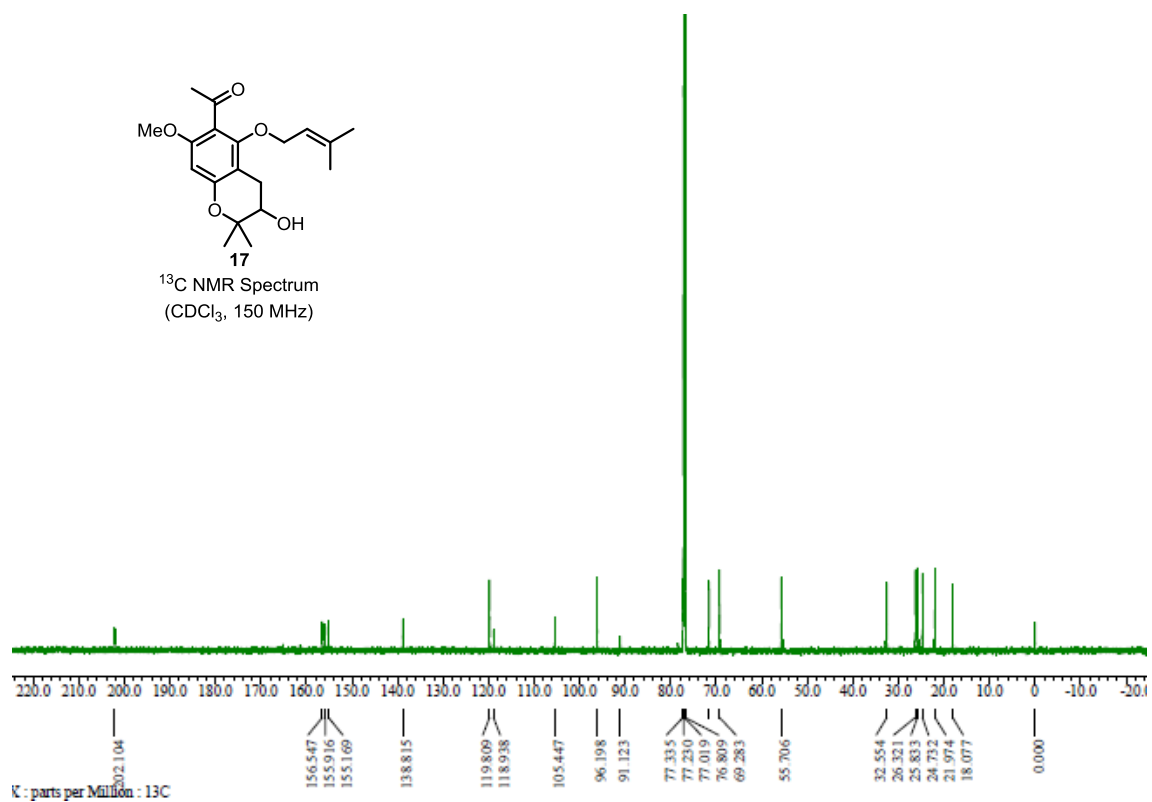

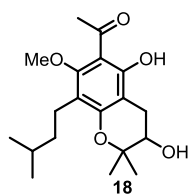

<sup>1</sup>H NMR Spectrum  
(CDCl<sub>3</sub>, 400 MHz)

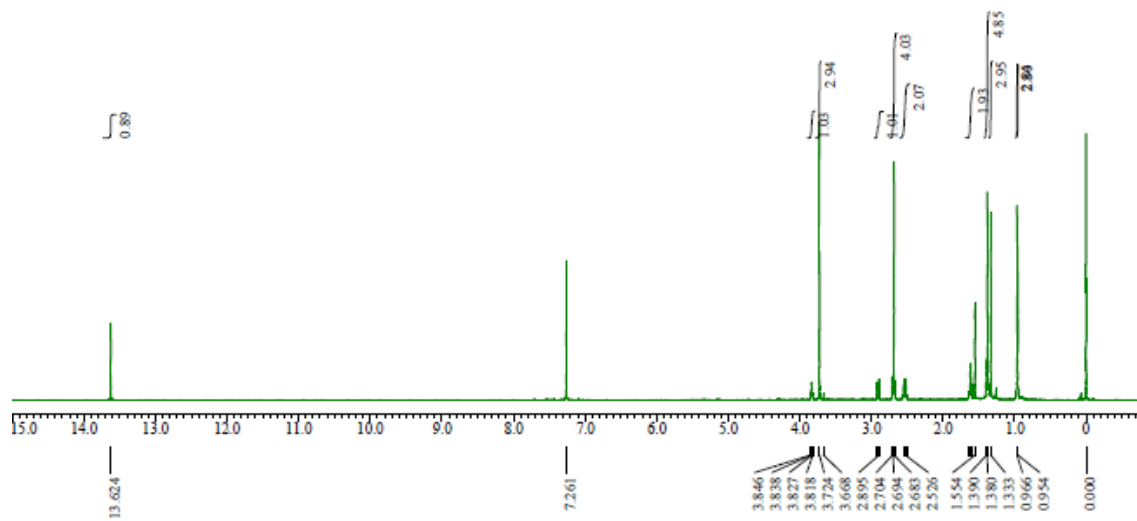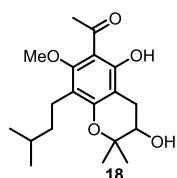

<sup>13</sup>C NMR Spectrum  
(CDCl<sub>3</sub>, 100 MHz)

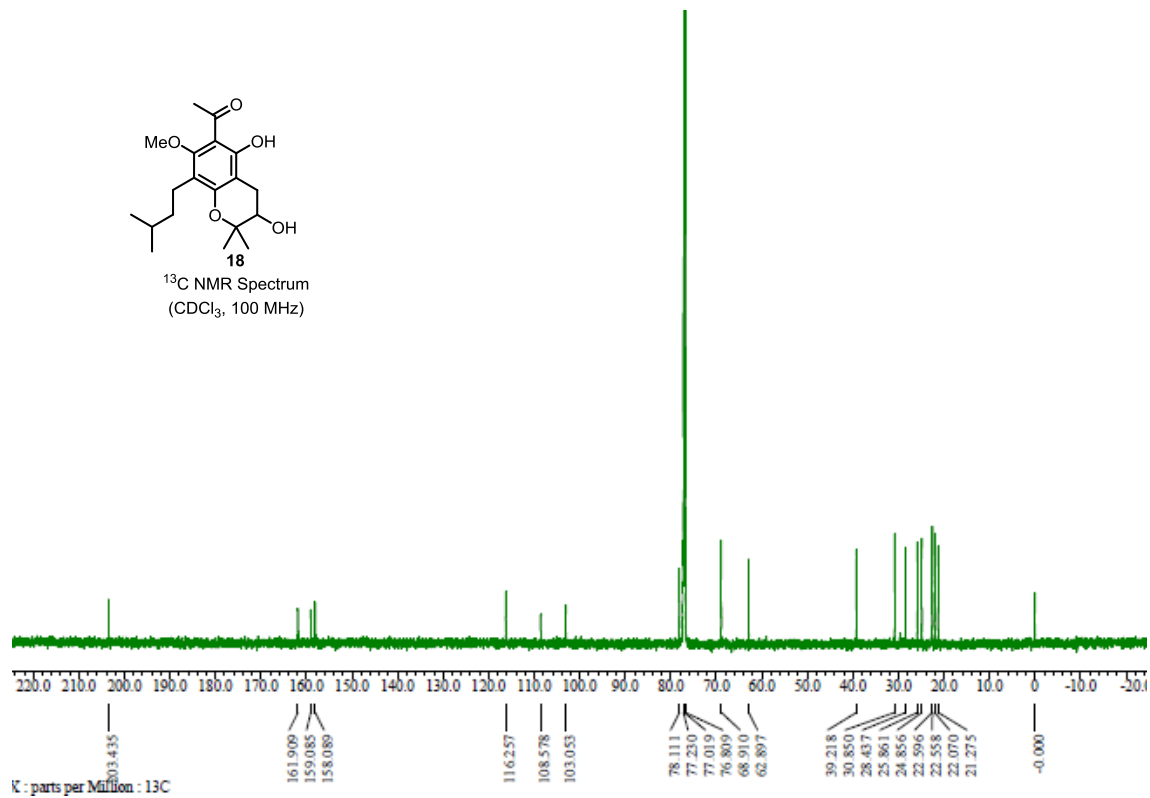

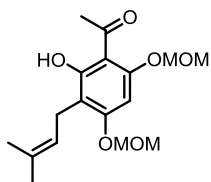

1-[2-hydroxy-4,6-bis(methoxymethoxy)-3-(3-methylbut-2-en-1-yl)phenyl]ethan-1-one  
<sup>1</sup>H NMR Spectrum  
 (CDCl<sub>3</sub>, 600 MHz)

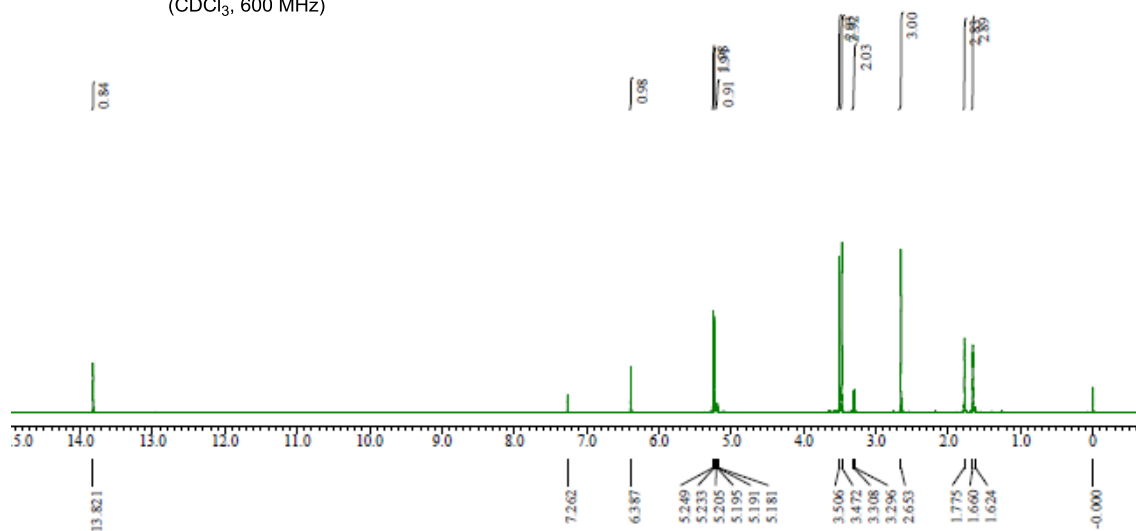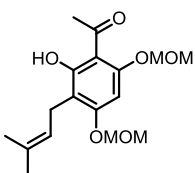

1-[2-hydroxy-4,6-bis(methoxymethoxy)-3-(3-methylbut-2-en-1-yl)phenyl]ethan-1-one  
<sup>13</sup>C NMR Spectrum  
 (CDCl<sub>3</sub>, 150 MHz)

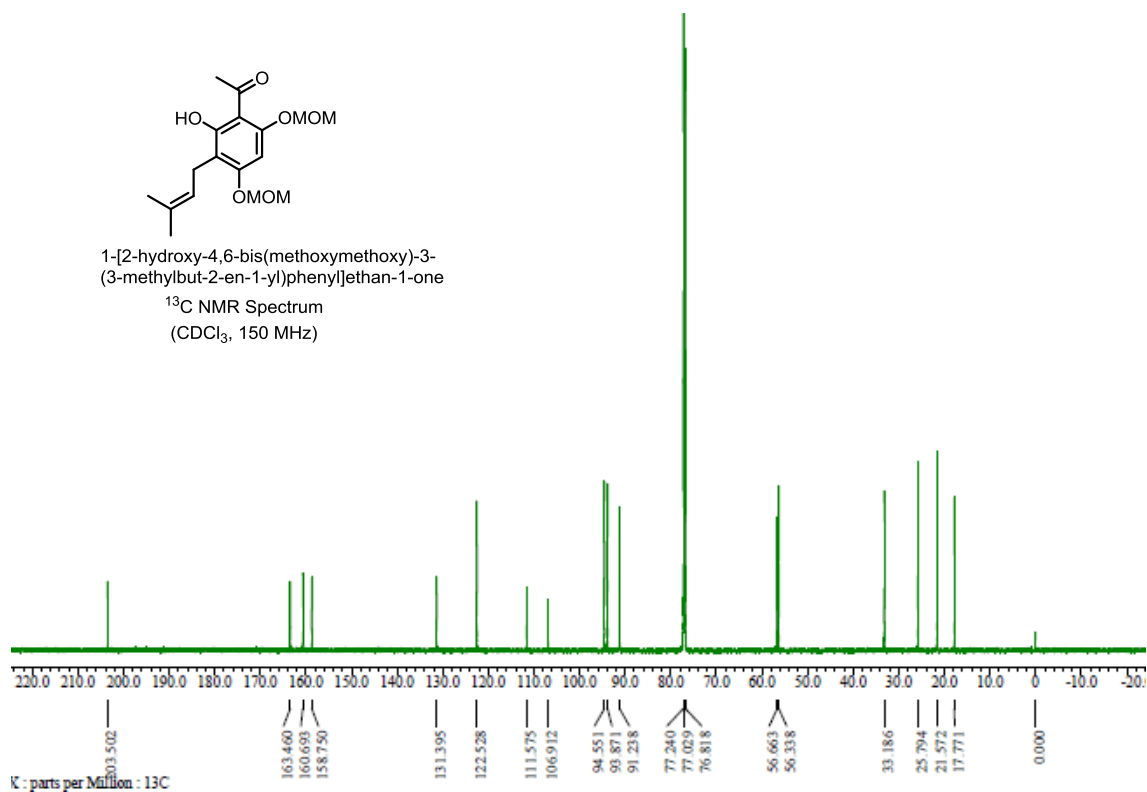

K : parts per Million : 13C

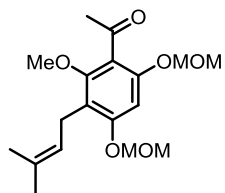

1-[2-methoxy-4,6-bis(methoxymethoxy)-3-(3-methylbut-2-en-1-yl)phenyl]ethan-1-one

<sup>1</sup>H NMR Spectrum  
(CDCl<sub>3</sub>, 600 MHz)

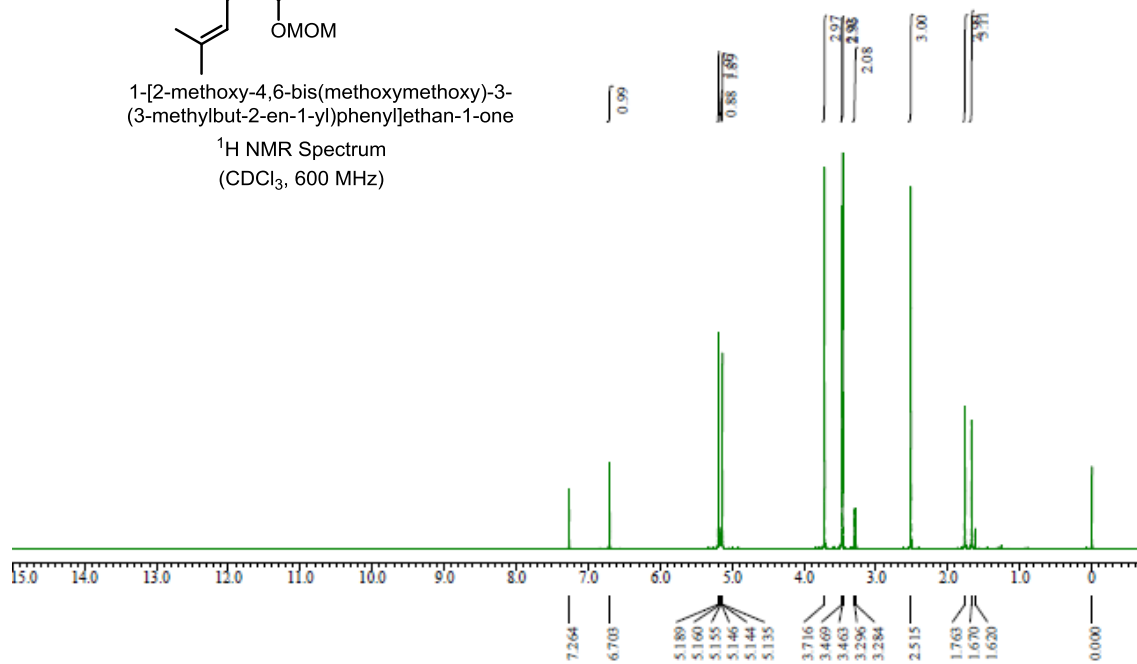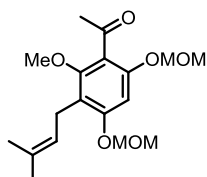

1-[2-methoxy-4,6-bis(methoxymethoxy)-3-(3-methylbut-2-en-1-yl)phenyl]ethan-1-one

<sup>13</sup>C NMR Spectrum  
(CDCl<sub>3</sub>, 150 MHz)

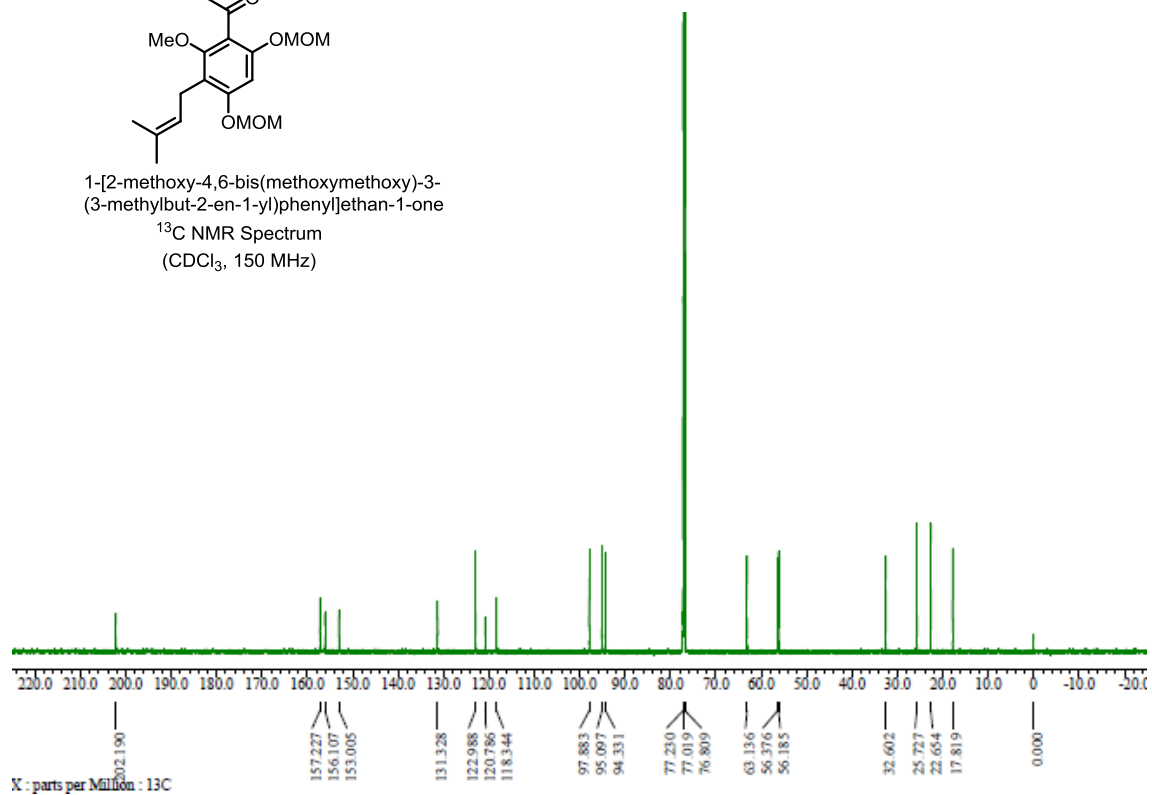

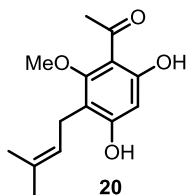

<sup>1</sup>H NMR Spectrum  
(CDCl<sub>3</sub>, 600 MHz)

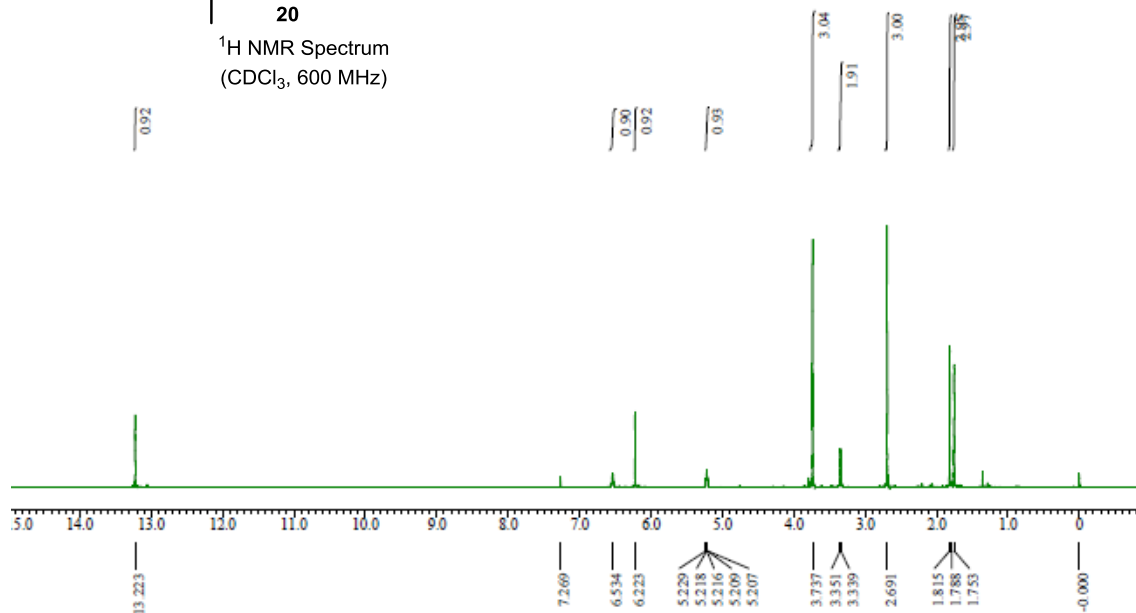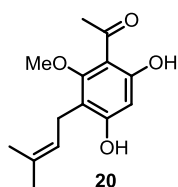

<sup>13</sup>C NMR Spectrum  
(CDCl<sub>3</sub>, 150 MHz)

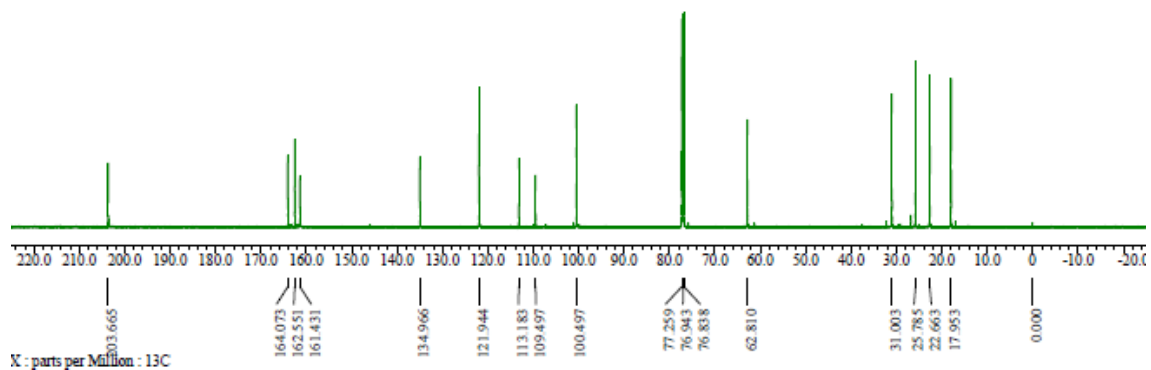

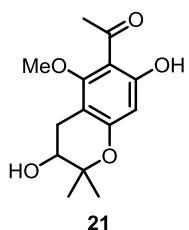

<sup>1</sup>H NMR Spectrum  
(CDCl<sub>3</sub>, 600 MHz)

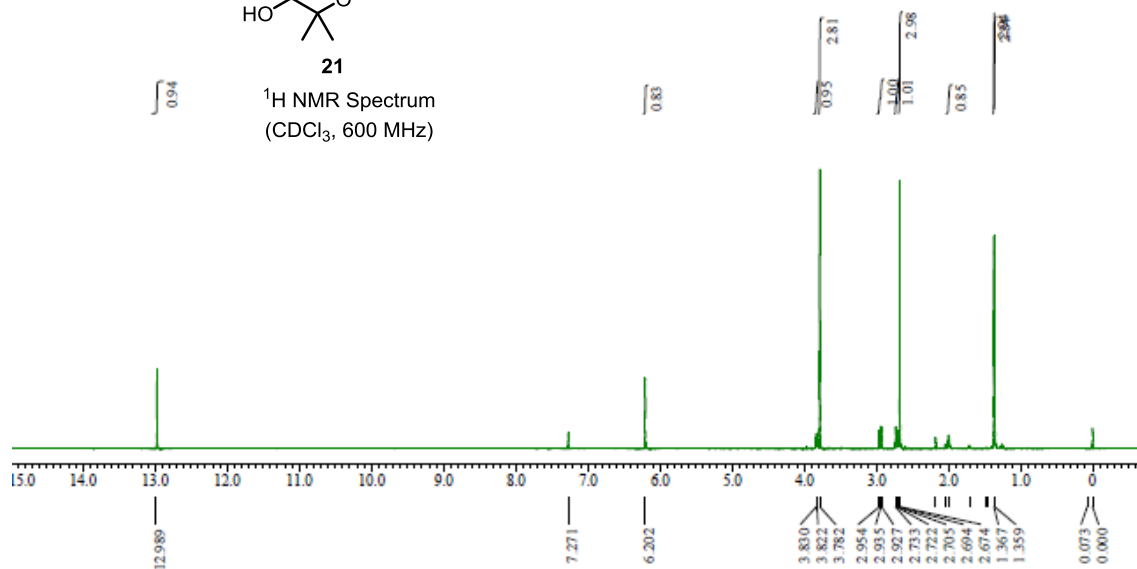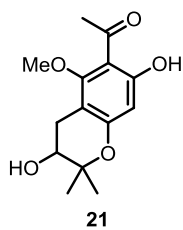

<sup>13</sup>C NMR Spectrum  
(CDCl<sub>3</sub>, 150 MHz)

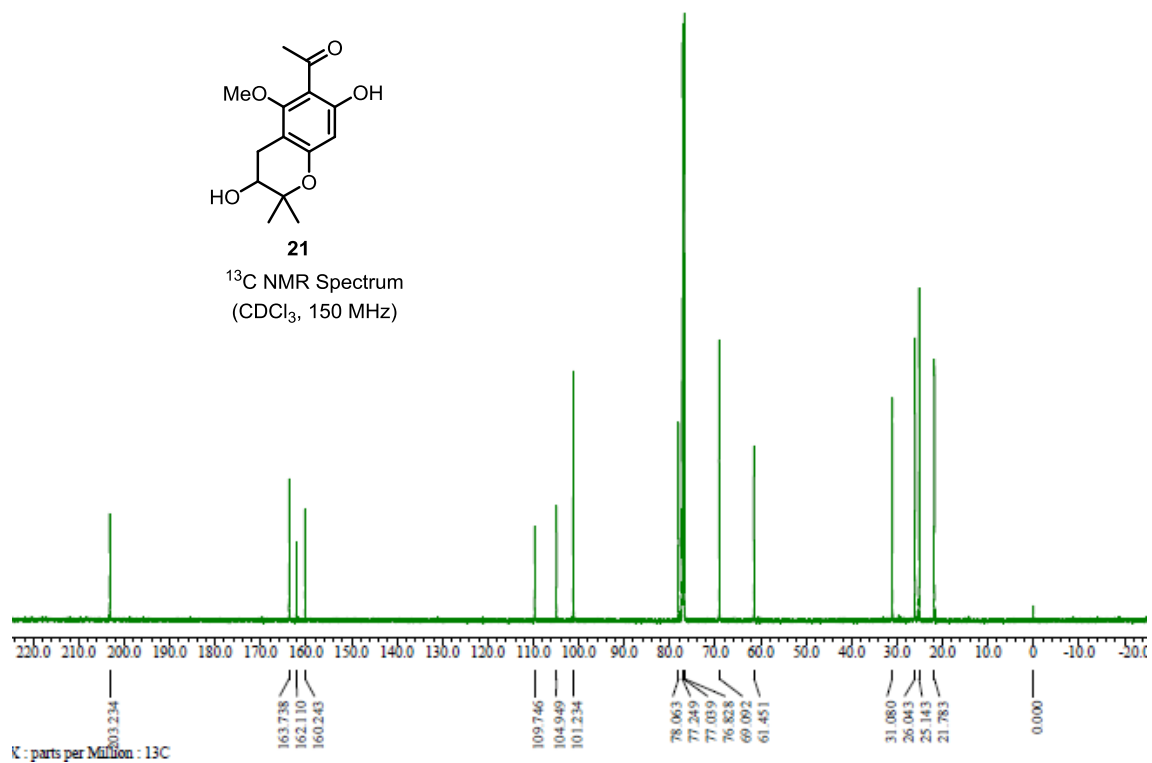

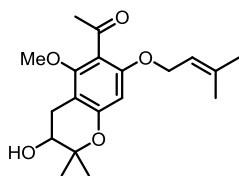

1-(3-hydroxy-5-methoxy-2,2-dimethyl-7-((3-methylbut-2-en-1-yl)oxy)chroman-6-yl)ethan-1-one  
<sup>1</sup>H NMR Spectrum  
 (CDCl<sub>3</sub>, 600 MHz)

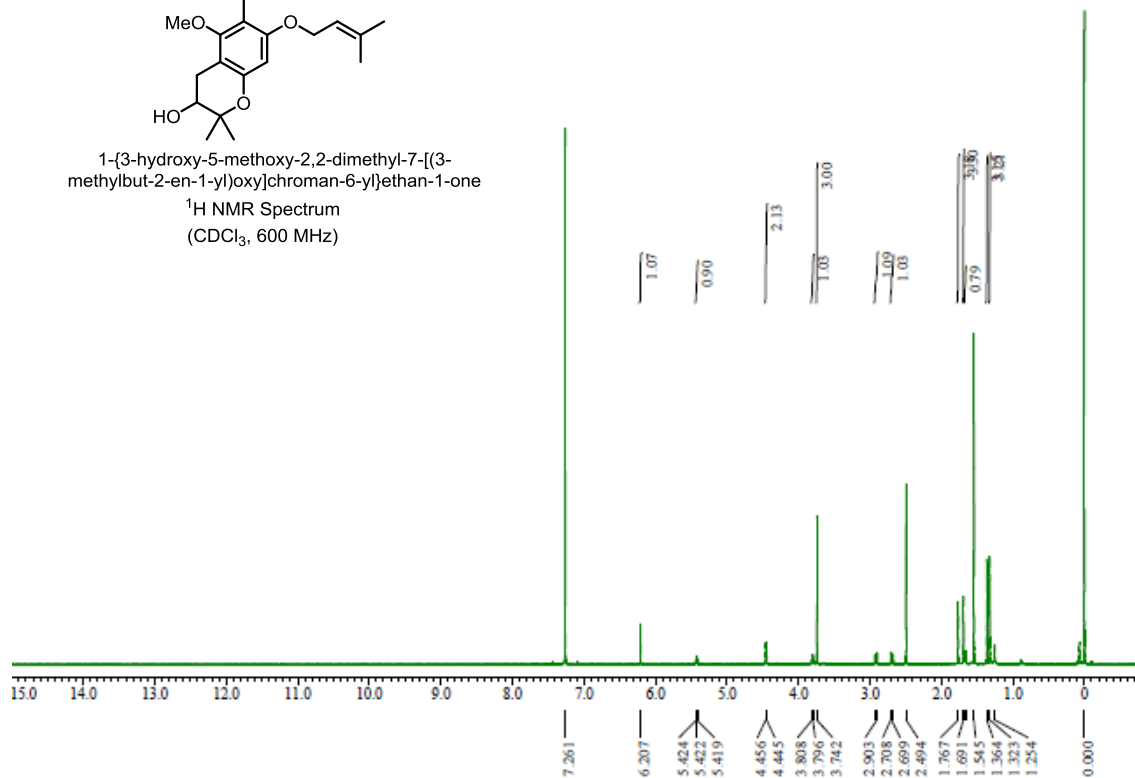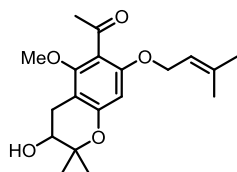

1-(3-hydroxy-5-methoxy-2,2-dimethyl-7-((3-methylbut-2-en-1-yl)oxy)chroman-6-yl)ethan-1-one  
<sup>13</sup>C NMR Spectrum  
 (CDCl<sub>3</sub>, 150 MHz)

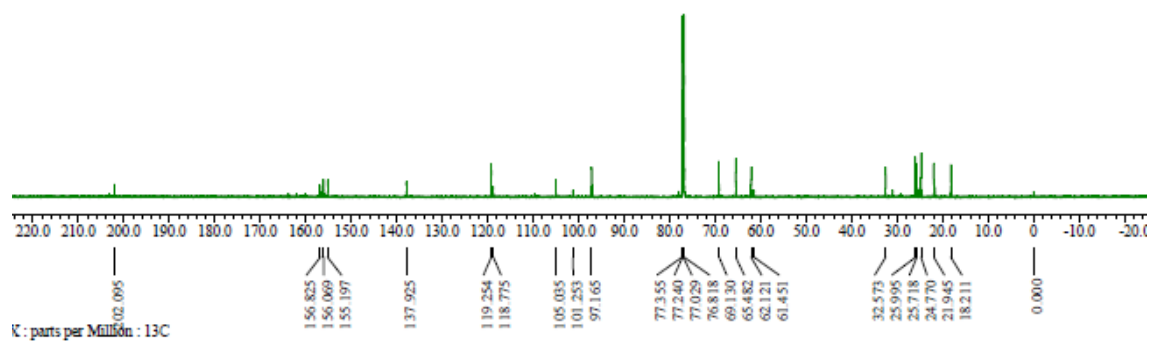



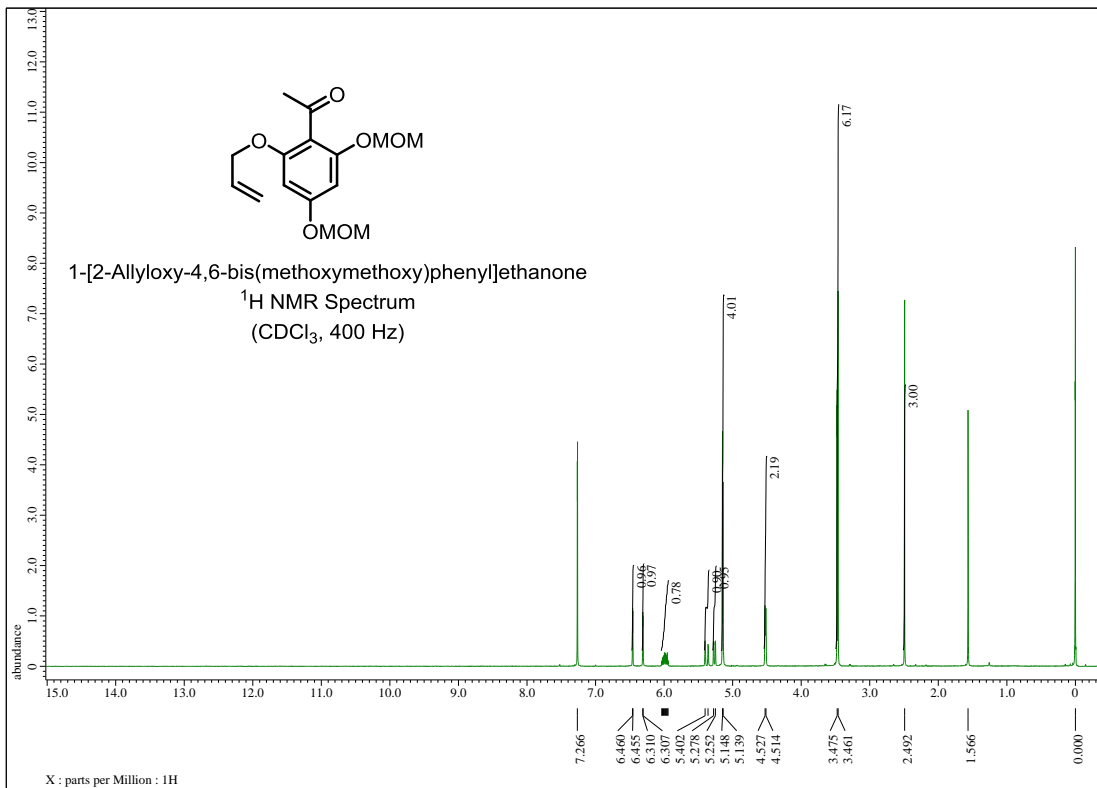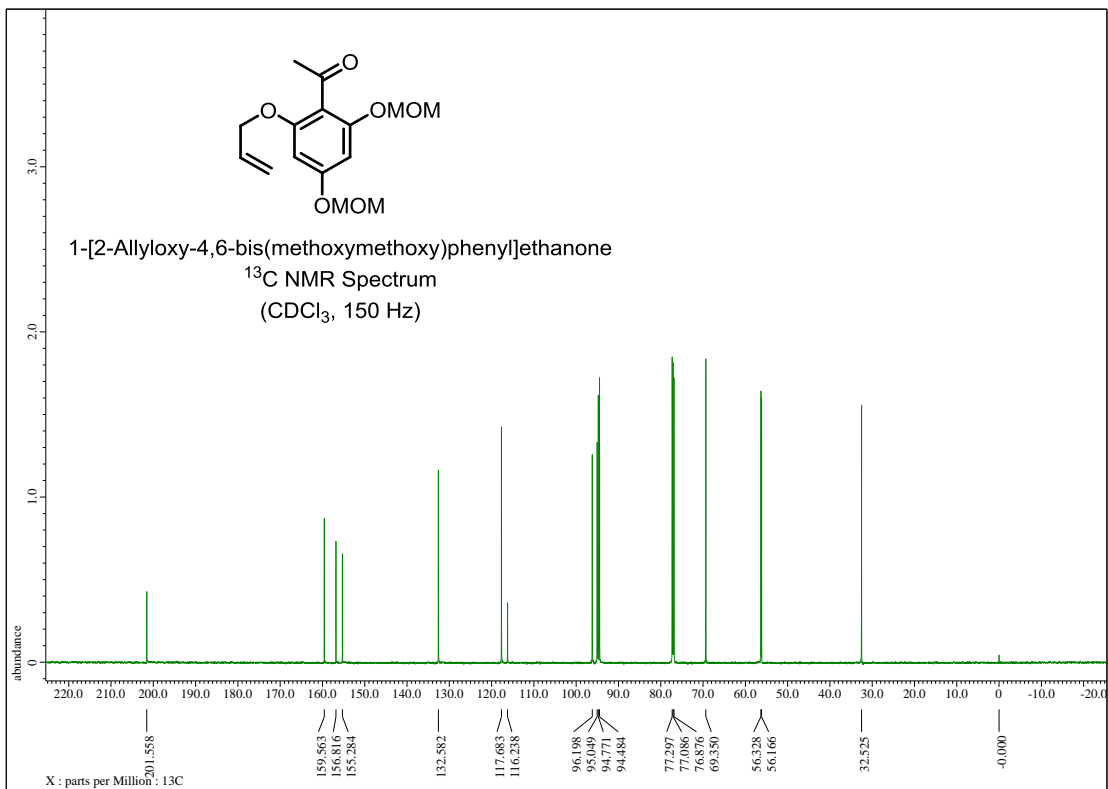

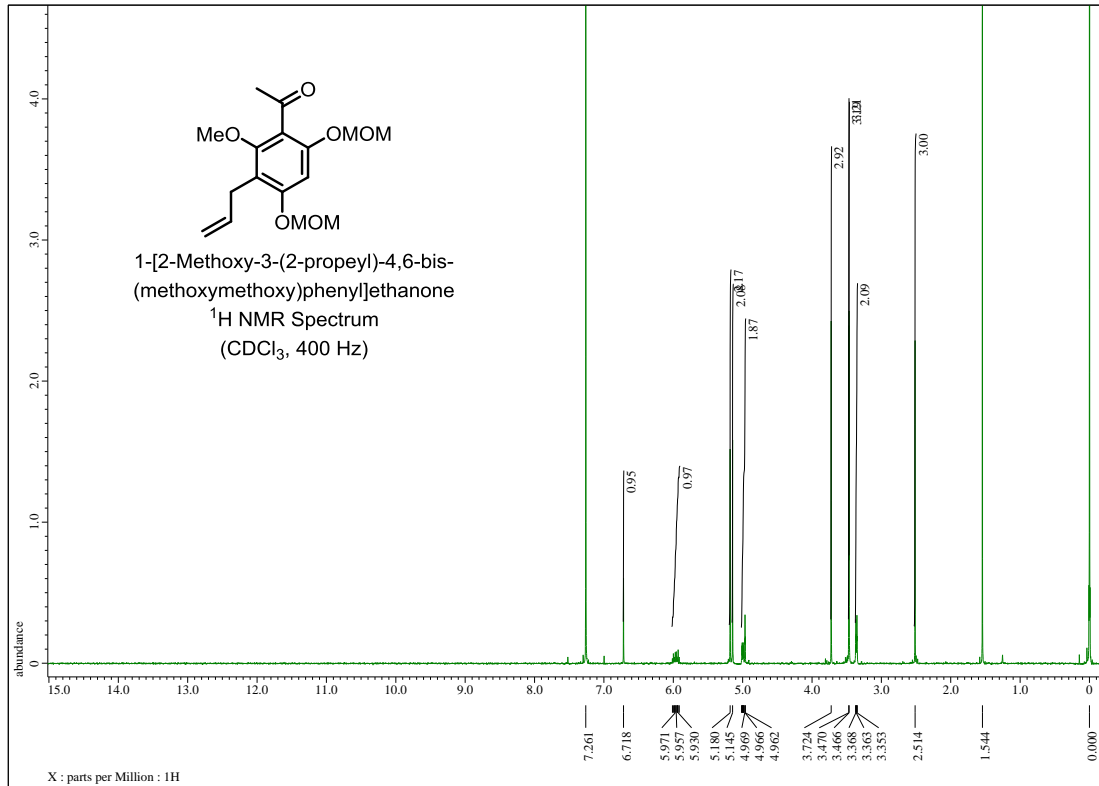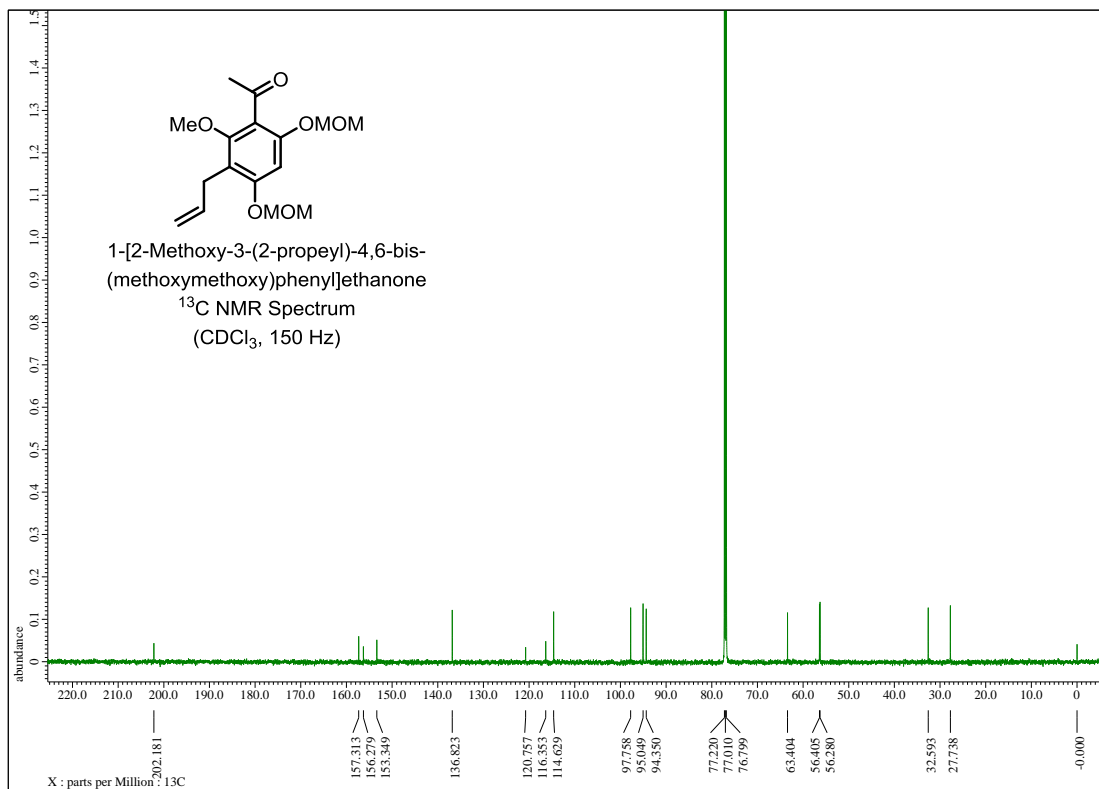

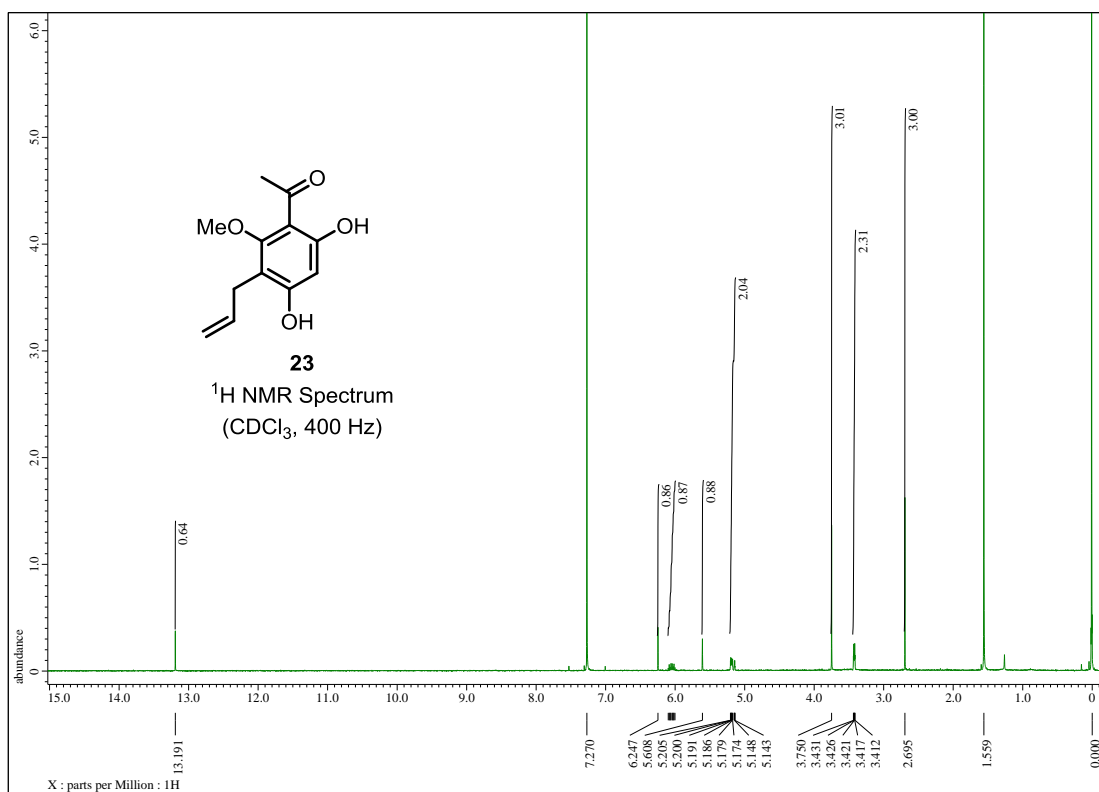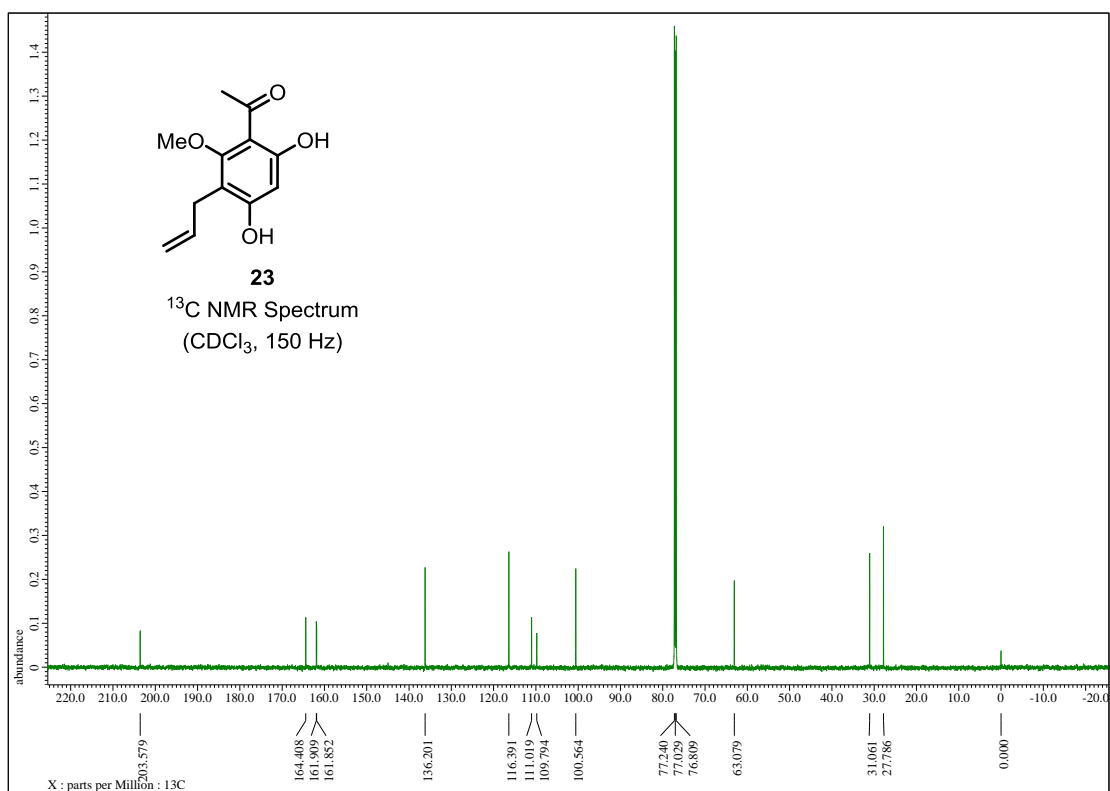

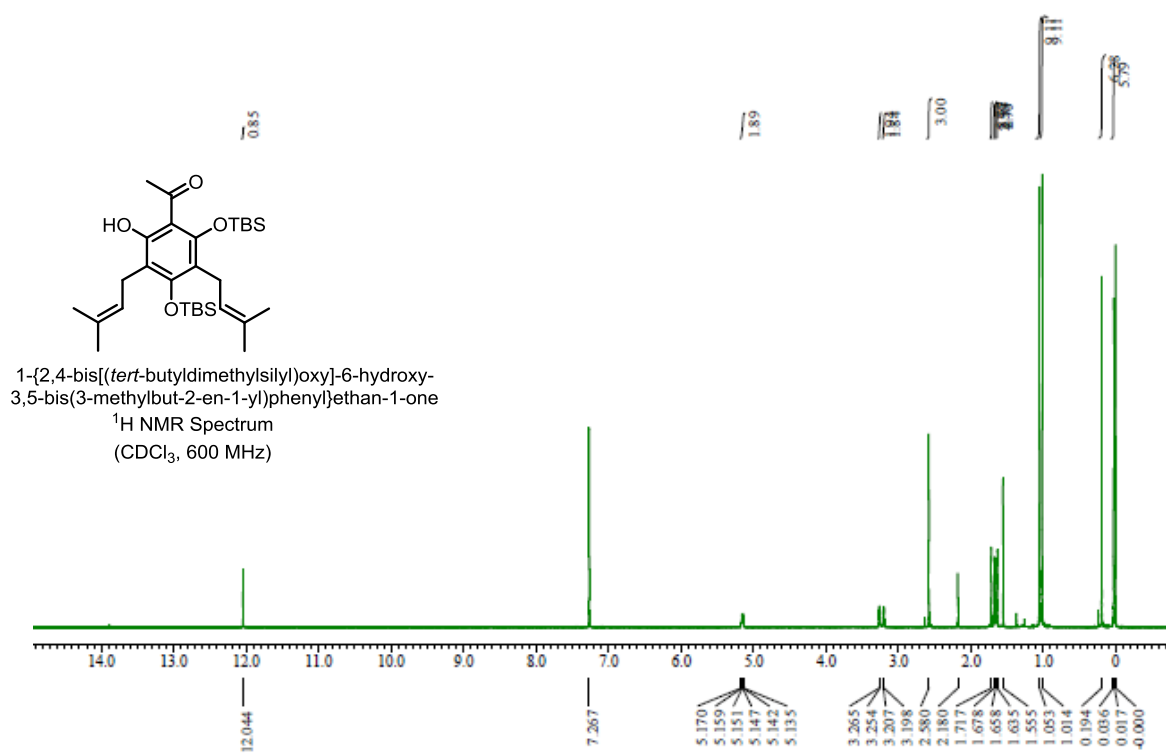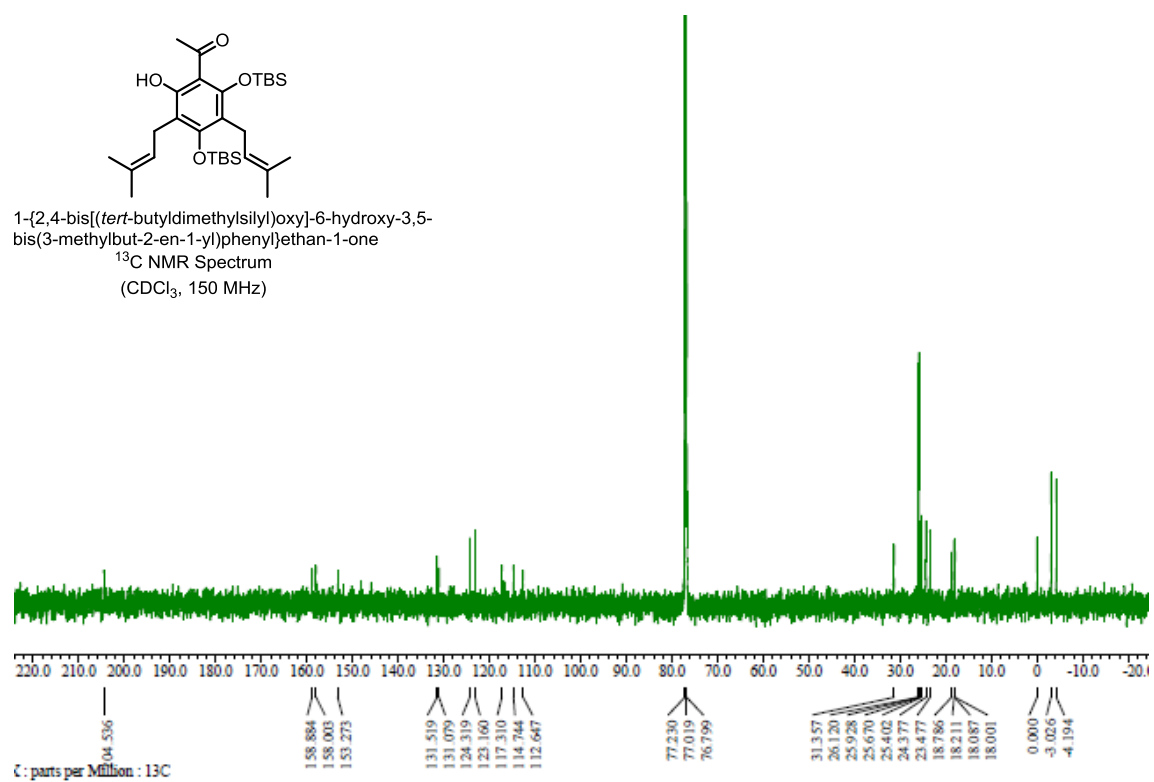

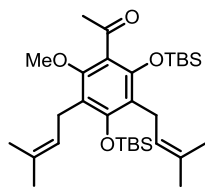

1-(2,4-bis((*tert*-butyldimethylsilyl)oxy)-6-methoxy-3,5-bis(3-methylbut-2-en-1-yl)phenyl)ethan-1-one  
<sup>1</sup>H NMR Spectrum  
 (CDCl<sub>3</sub>, 600 MHz)

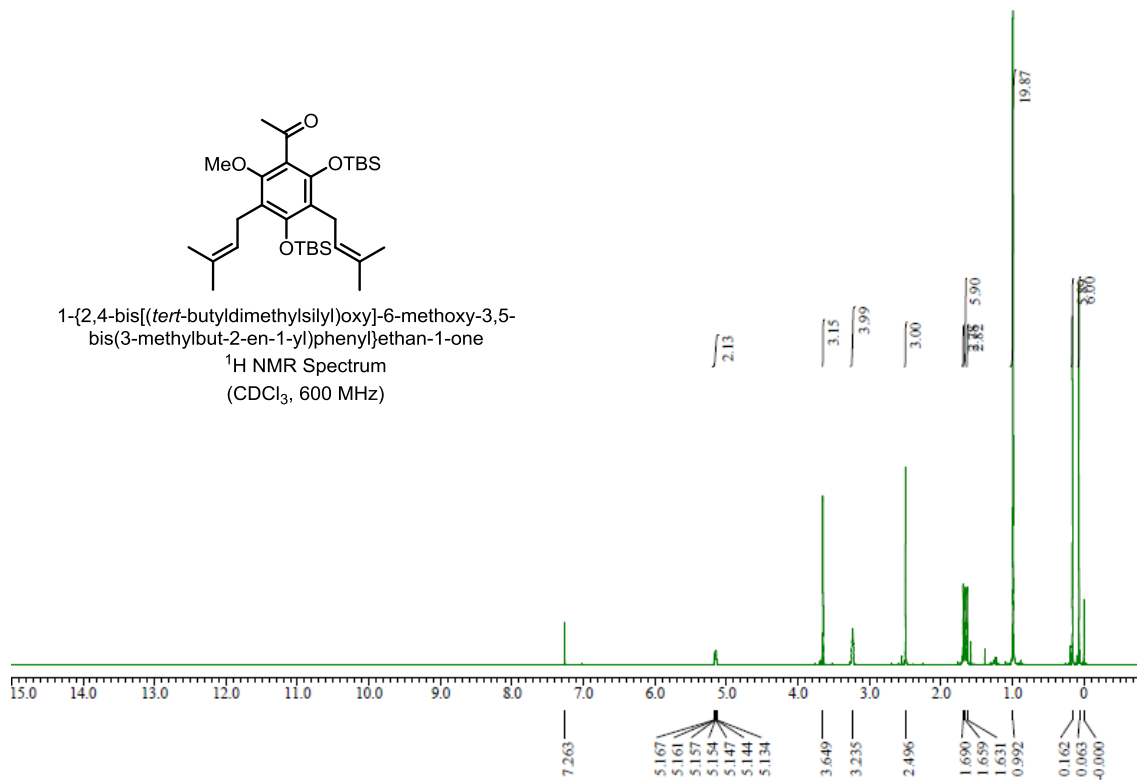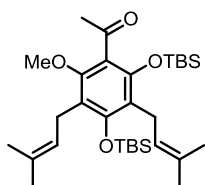

1-(2,4-bis((*tert*-butyldimethylsilyl)oxy)-6-methoxy-3,5-bis(3-methylbut-2-en-1-yl)phenyl)ethan-1-one  
<sup>13</sup>C NMR Spectrum  
 (CDCl<sub>3</sub>, 150 MHz)

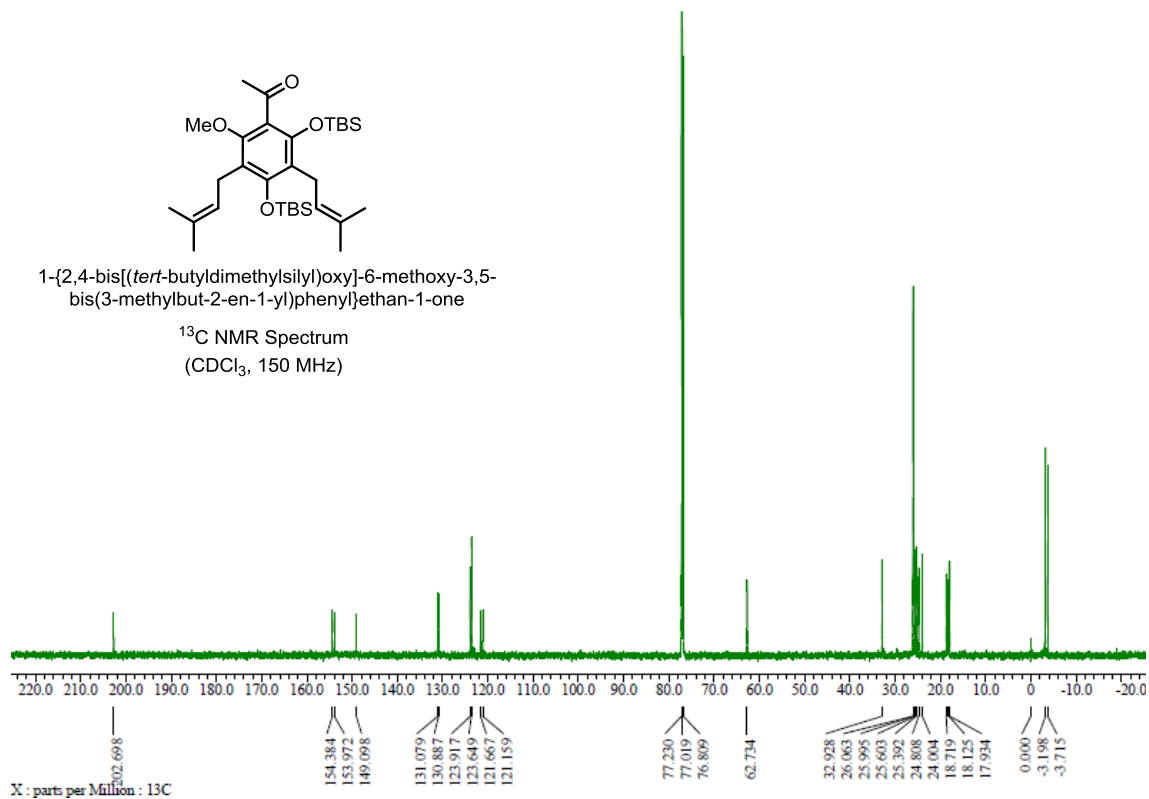

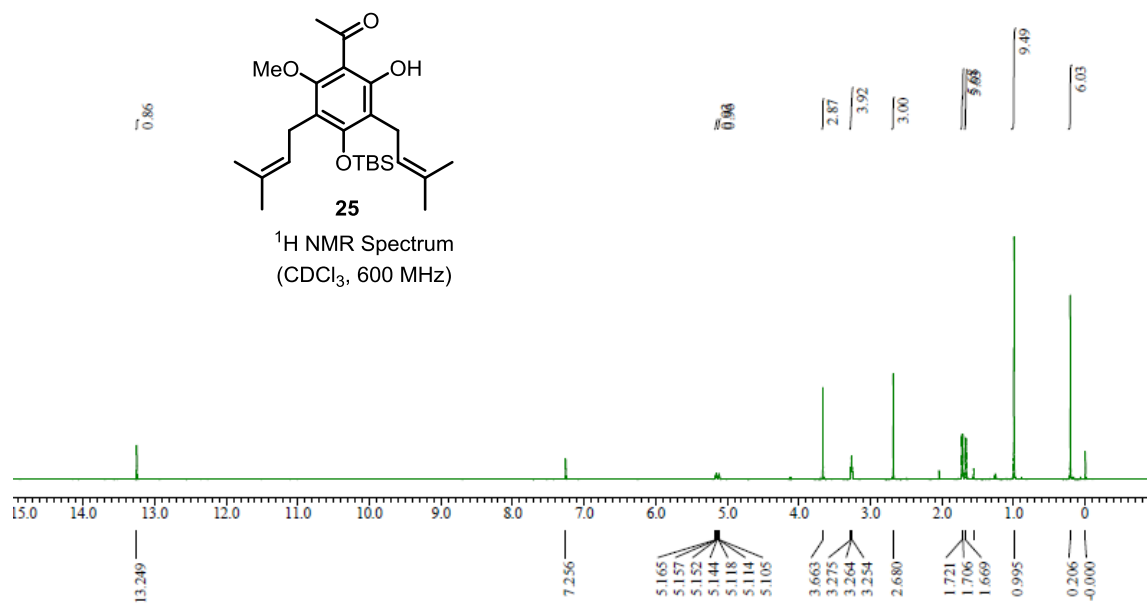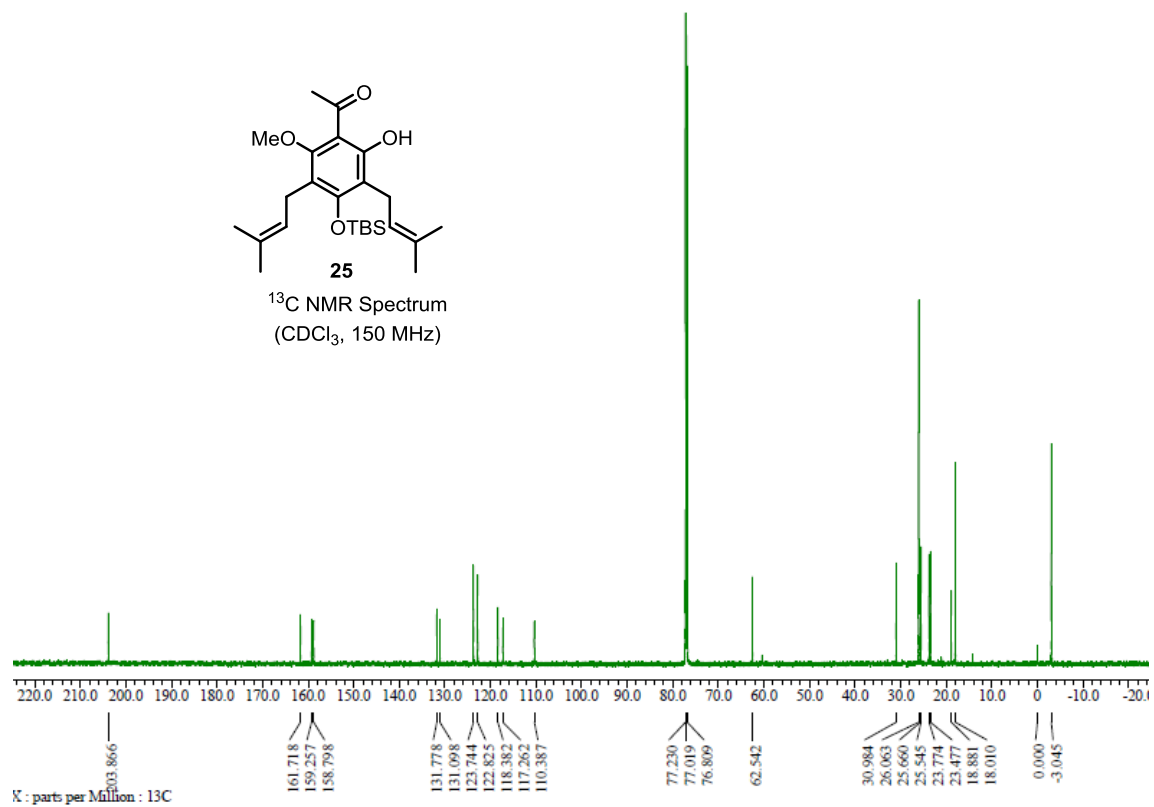

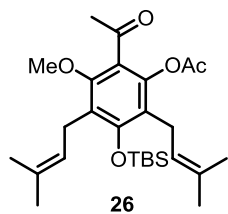

<sup>1</sup>H NMR Spectrum  
(CDCl<sub>3</sub>, 600 MHz)

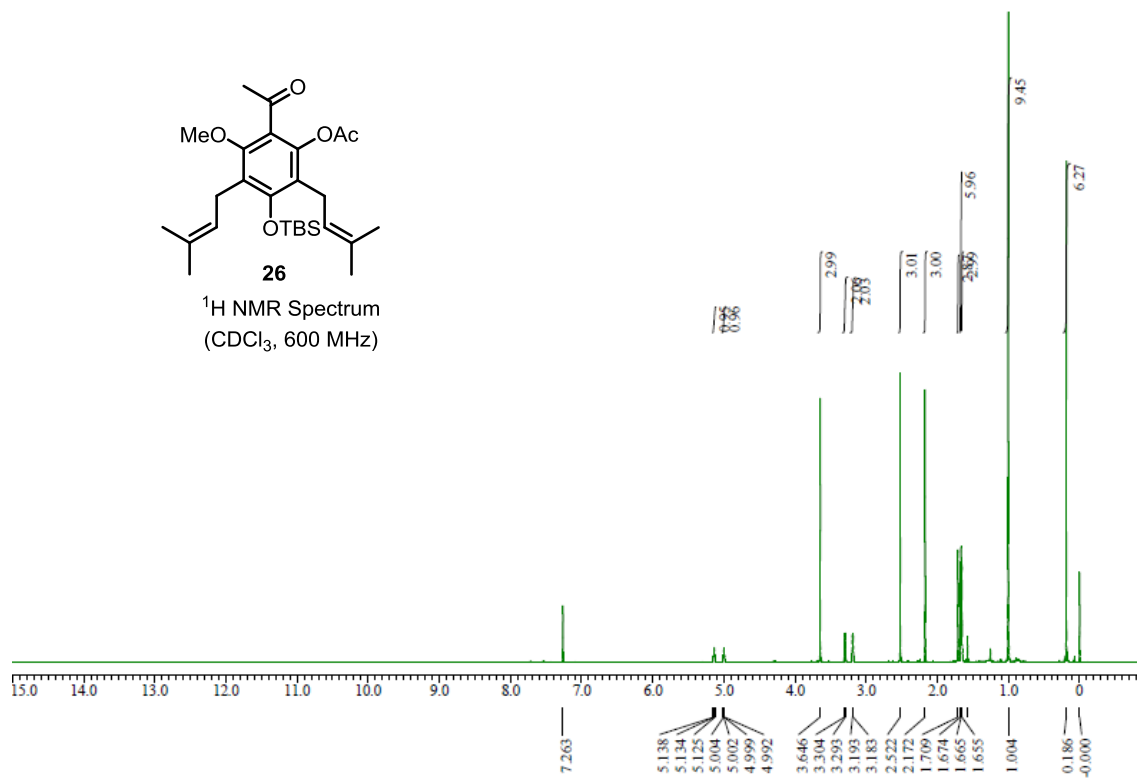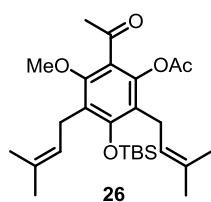

<sup>13</sup>C NMR Spectrum  
(CDCl<sub>3</sub>, 100 MHz)

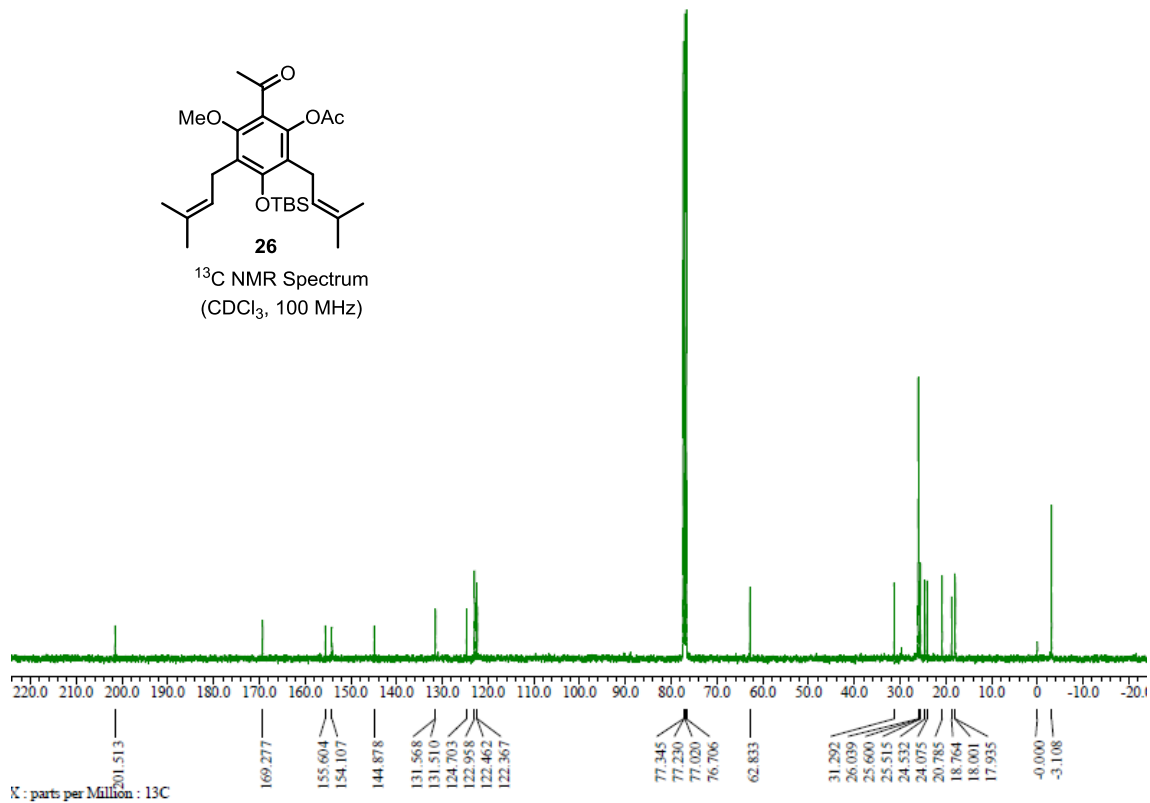

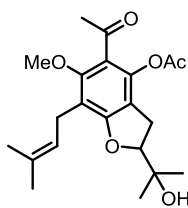

**29**

<sup>1</sup>H NMR Spectrum  
(CDCl<sub>3</sub>, 600 MHz)

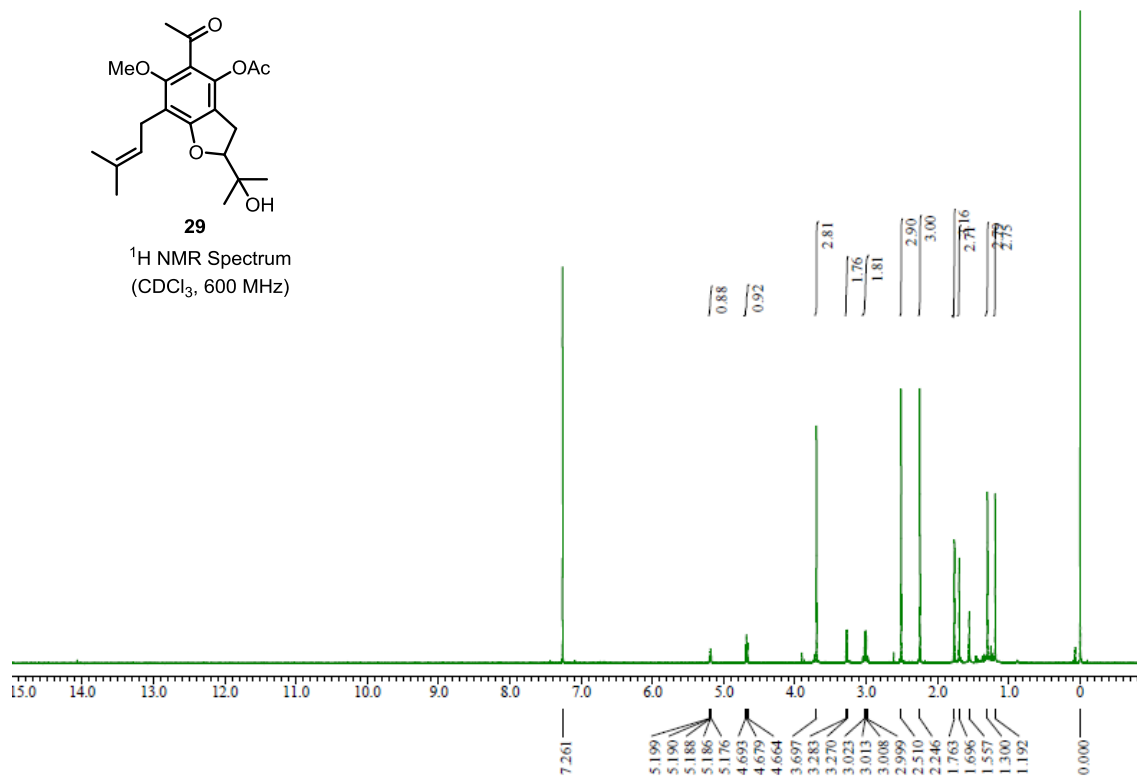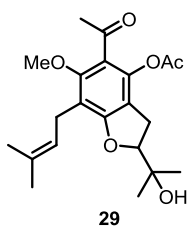

**29**

<sup>13</sup>C NMR Spectrum  
(CDCl<sub>3</sub>, 100 MHz)

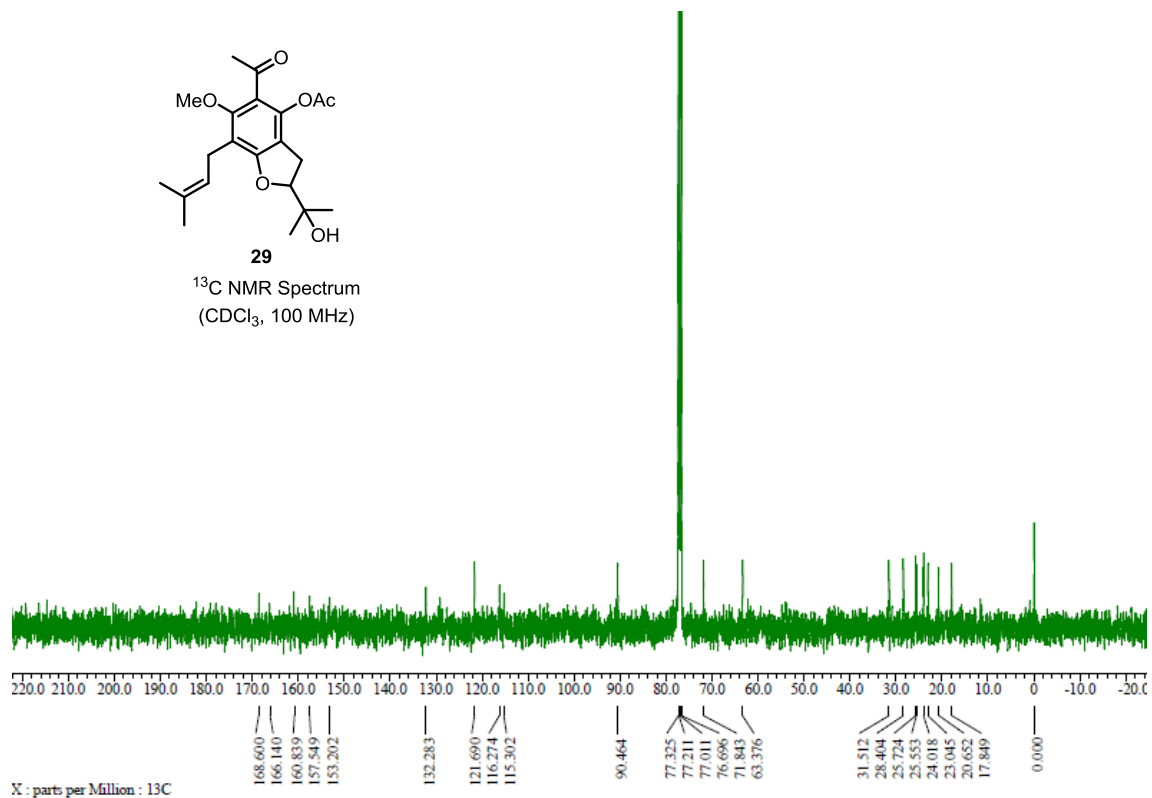

X : parts per Million : 13C



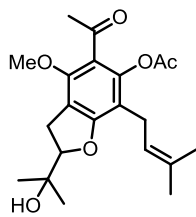

**30**  
<sup>1</sup>H NMR Spectrum  
 (CDCl<sub>3</sub>, 600 MHz)

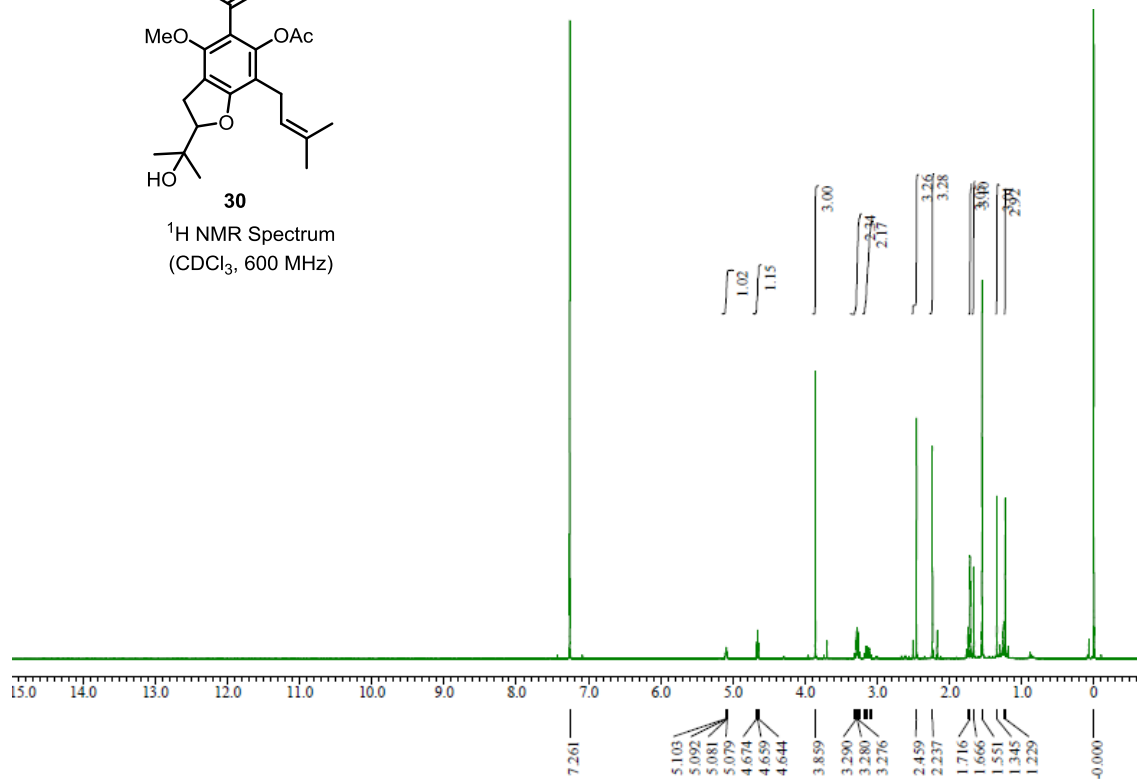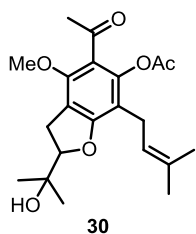

**30**  
<sup>13</sup>C NMR Spectrum  
 (CDCl<sub>3</sub>, 100 MHz)

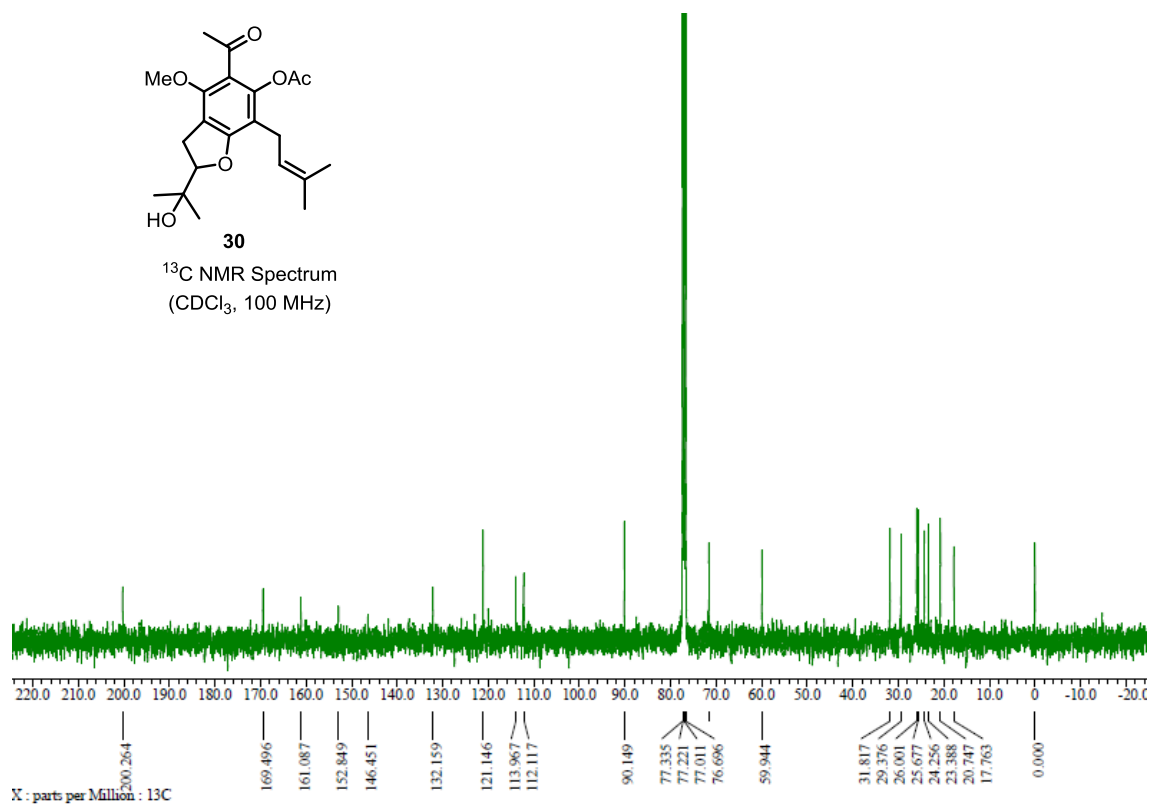

### Assay Curve for Table 3.

Relative Ratio<sup>a</sup> of EBV-EA Activation with Respect to Positive Control (100%)

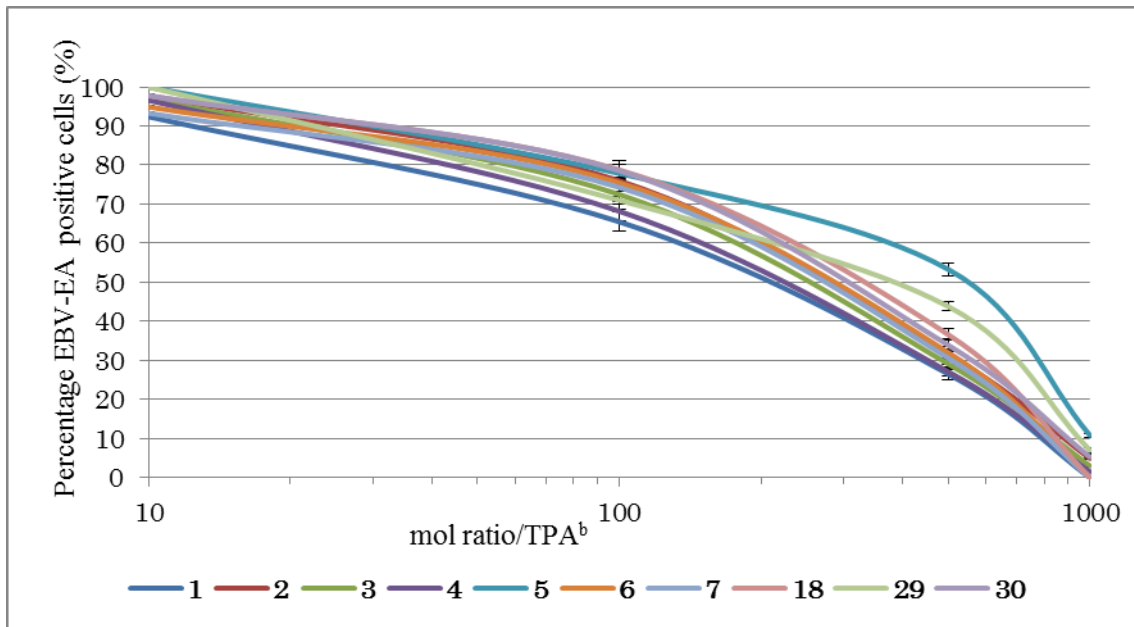

<sup>a</sup>Values represent percentages relative to the positive control value (100%). <sup>b</sup>TPA concentration is 20 ng/mL (32 pmol/mL).
